# Supplementary material for: Ligand properties of boryl ligands in bis-boryl rhodium(iii) complexes: a case study
Source: Royal Society of Chemistry journal article supplement (doi:10.1039/d1dt04276a), 2022-01-01
Supplement: d1dt04276a1.pdf [file d1dt04276a1.pdf]

## Electronic Supplementary Information (ESI)

# Ligand Properties of Boryl Ligands in bis-Boryl Rhodium(III) Complexes: A Case Study

Wiebke Drescher<sup>†</sup> and Christian Kleeberg<sup>†,\*</sup>

<sup>†</sup>Institut für Anorganische und Analytische Chemie, Technische Universität Braunschweig, Germany.

\* Author E-mail Address: ch.kleeberg@tu-braunschweig.de

### Contents

#### 1. Experimental and Spectroscopic Data

##### a. Additional Experimental Data

[Rh(PPh<sub>3</sub>)<sub>2</sub>(Bcat)(Bpin)Cl] ..... S2

##### b. *In situ* NMR experiments:

Reaction of [Rh(PMe<sub>3</sub>)<sub>3</sub>Cl] with the diboranes(4) **1a-e** ..... S3

[Rh(PMe<sub>3</sub>)<sub>3</sub>(Bpin)<sub>2</sub>Cl] (**2b**) + PMe<sub>3</sub> ..... S11

##### c. VT-NMR spectra of **2a-c**, **3b**:

[Rh(PMe<sub>3</sub>)<sub>3</sub>(Bcat)<sub>2</sub>Cl] (**2a**) ..... S12

[Rh(PMe<sub>3</sub>)<sub>3</sub>(Bpin)<sub>2</sub>Cl] (**2b**) ..... S13

[Rh(PMe<sub>3</sub>)<sub>2</sub>(Bpin)<sub>2</sub>Cl] (**3b**) ..... S14

[Rh(PMe<sub>3</sub>)<sub>3</sub>(Bpin)<sub>2</sub>Cl] · [Rh(PMe<sub>3</sub>)<sub>2</sub>(Bpin)<sub>2</sub>Cl] (**2b-3b**) ..... S15

[Rh(PMe<sub>3</sub>)<sub>3</sub>(Bcat)(Bpin)Cl] (**2c**) ..... S17

##### d. VT-NMR spectra of **4a-c**, **5c**, **6c** :

[Rh(PMe<sub>3</sub>)<sub>4</sub>(Bcat)<sub>2</sub>][BArF] (**4a**) ..... S18

[Rh(PMe<sub>3</sub>)<sub>4</sub>(Bpin)<sub>2</sub>][BArF] (**4b**) ..... S19

[Rh(PMe<sub>3</sub>)<sub>4</sub>(Bcat)(Bpin)] [BArF] (**4c**) ..... S20

[[Rh(PMe<sub>3</sub>)<sub>3</sub>(NCMe)(Bcat)(Bpin)] [BArF] (**5c**) ..... S21

[Rh(PMe<sub>3</sub>)<sub>3</sub>(CNMe)(Bcat)(Bpin)] [BArF] (**6c**) ..... S22

#### 2. Crystallographic Data

a. Crystallographic Data Collection Parameters ..... S23

b. [(Me<sub>3</sub>P)<sub>4</sub>RhH(Cl)][B(1,2-O<sub>2</sub>C<sub>6</sub>H<sub>4</sub>)<sub>2</sub>](THF) ..... S27

c. [(Me<sub>3</sub>P)<sub>2</sub>Rh(Bpin)<sub>2</sub>(Cl)] (**3b**) and **2b-3b** ..... S28

d. [Rh(PPh<sub>3</sub>)<sub>2</sub>(Bcat)(Bpin)(Cl)](CH<sub>2</sub>Cl<sub>2</sub>)<sub>3.5</sub>(C<sub>5</sub>H<sub>12</sub>)<sub>0.6</sub> ..... S30

e. [Rh(PMe<sub>3</sub>)<sub>3</sub>(Bcat)(Bpin)(L)][BArF] (L = MeCN (**5c**), MeNC (**6c**)) ..... S31

3. References ..... S32

# 1. Experimental and Spectroscopic Data

## 1.a. Additional Experimental Data

### [Rh(PPh<sub>3</sub>)<sub>2</sub>(Bcat)(Bpin)(Cl)]

[Rh(PPh<sub>3</sub>)<sub>3</sub>Cl] (30 mg, 32 μmol, 1 eq.) and pinB-Bcat (**1c**) (8 mg, 32 mmol, 1 eq.) were dissolved in DCM/*n*-pentane (17 mL, 1:1). After 16 at rt all volatiles were removed *in vacuo* and the residue dissolved in DCM (0.5 mL) and layered with *n*-pentane (2 mL). After several days a few single crystals suitable for x-ray analysis of the approximate composition [Rh(PPh<sub>3</sub>)<sub>2</sub>(Bcat)(Bpin)(Cl)](CH<sub>2</sub>Cl<sub>2</sub>)<sub>3.5</sub>(C<sub>5</sub>H<sub>12</sub>)<sub>0.5</sub> had separated.

## 1.b. *In situ* NMR experiments: Reaction of $[\text{Rh}(\text{PMe}_3)_3\text{Cl}]$ with the diboranes(4) 1a-e

*General Procedure:* To a solution of  $[\text{Rh}(\text{PMe}_3)_3\text{Cl}]$  (15 mg, 41  $\mu\text{mol}$ , 1.0 eq.) in  $\text{C}_6\text{D}_6$  or  $\text{THF-d}_8$  (0.7 mL) an equimolar amount of the diborane(4) derivative (41  $\mu\text{mol}$ , 1.0 equiv.) was added and the solution transferred to a screw-cap NMR Tube. The NMR spectra were recorded in the given intervals.

### $[\text{Rh}(\text{PMe}_3)_3\text{Cl}]$ with 1a

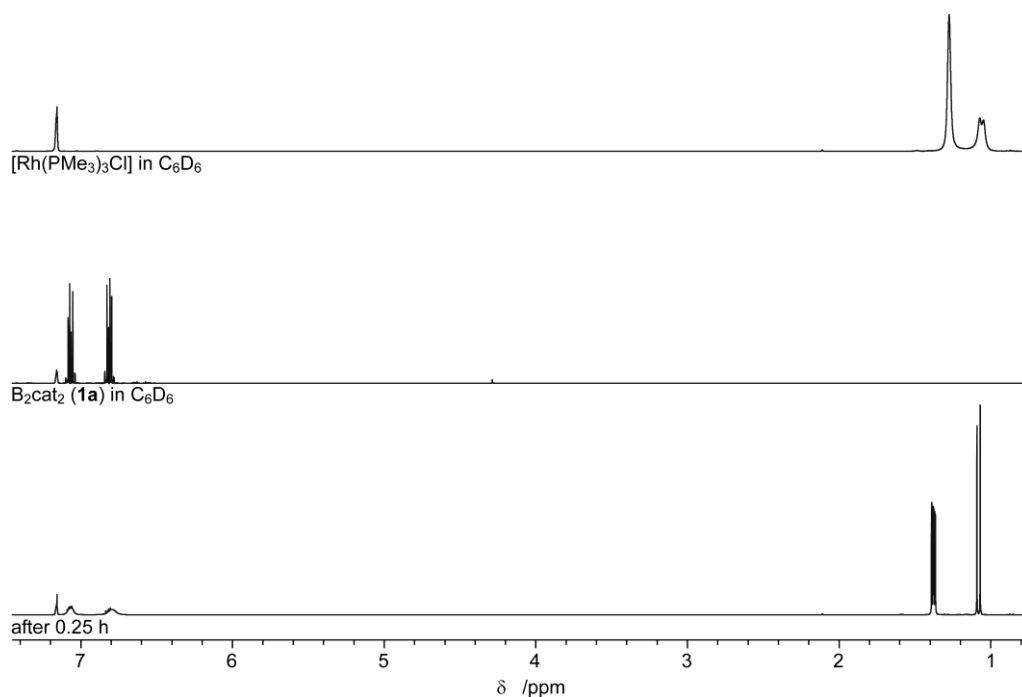

**Figure S1b.1:** *In situ*  $^1\text{H}$  NMR spectra of the reaction of  $[\text{Rh}(\text{PMe}_3)_3\text{Cl}]$  with **1a** and spectra of **1a** and  $[\text{Rh}(\text{PMe}_3)_3\text{Cl}]$  for comparison (300.3 MHz,  $\text{C}_6\text{D}_6$ , rt).

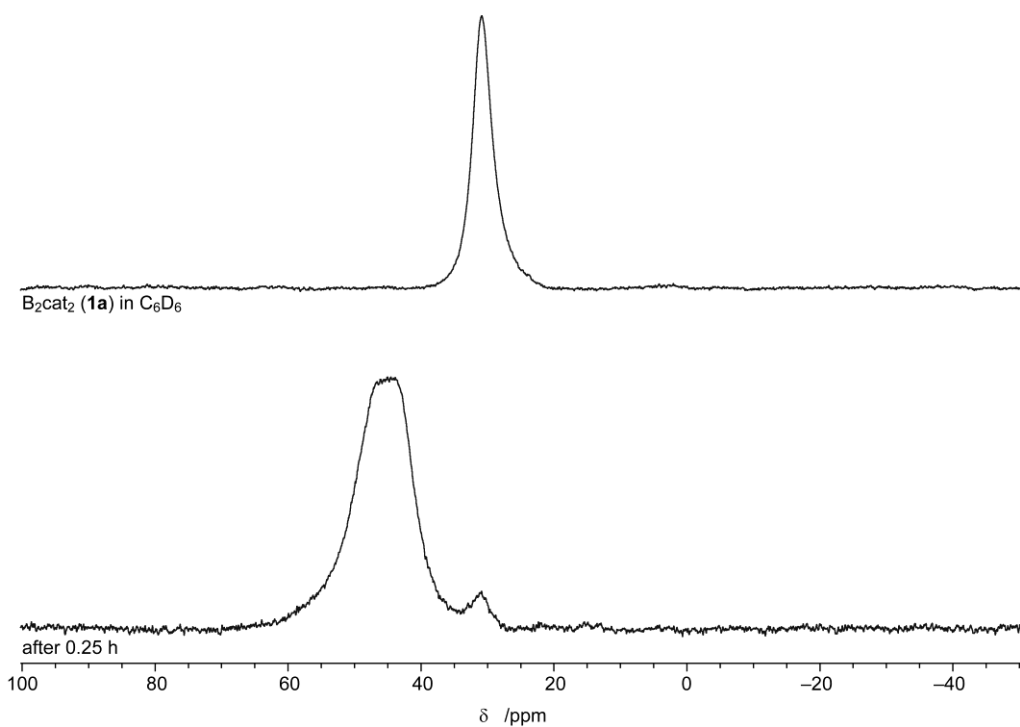

**Figure S1b.2:** *In situ* <sup>11</sup>B{<sup>1</sup>H} NMR spectra of the reaction of [Rh(PMe<sub>3</sub>)<sub>3</sub>Cl] with **1a** and a spectrum of **1a** for comparison (96.3 MHz, C<sub>6</sub>D<sub>6</sub>, rt).

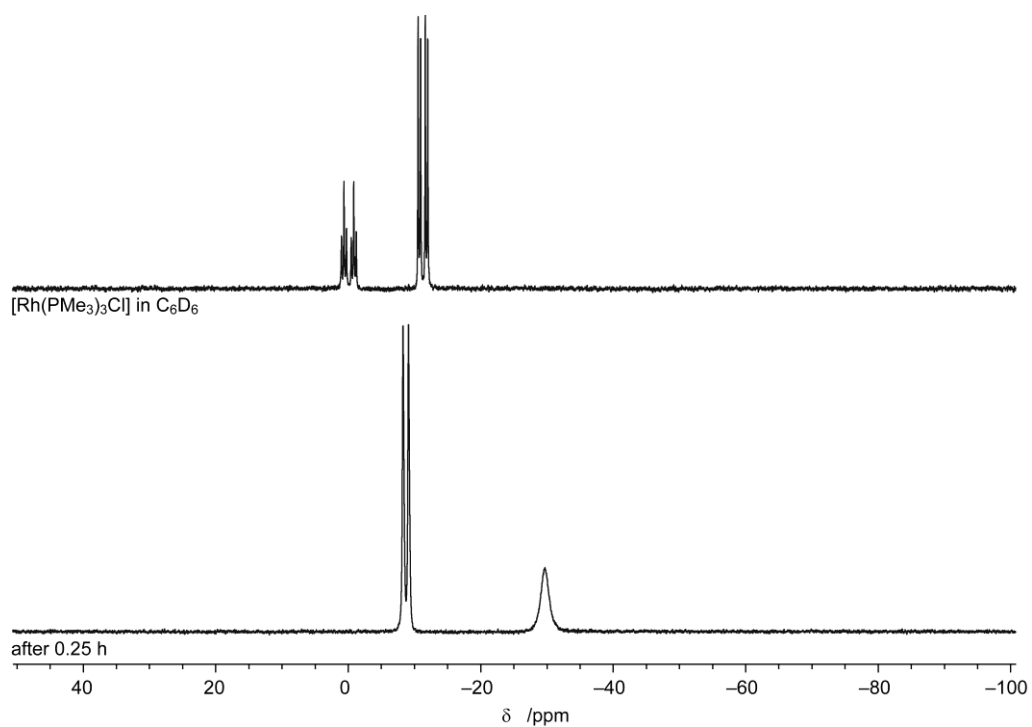

**Figure S1b.3:** *In situ* <sup>31</sup>P{<sup>1</sup>H} NMR spectra of the reaction of [Rh(PMe<sub>3</sub>)<sub>3</sub>Cl] with **1a** and a spectrum of [Rh(PMe<sub>3</sub>)<sub>3</sub>Cl] for comparison (121.5 MHz, C<sub>6</sub>D<sub>6</sub>, rt).

**[Rh(PMe<sub>3</sub>)<sub>3</sub>Cl] with 1b**

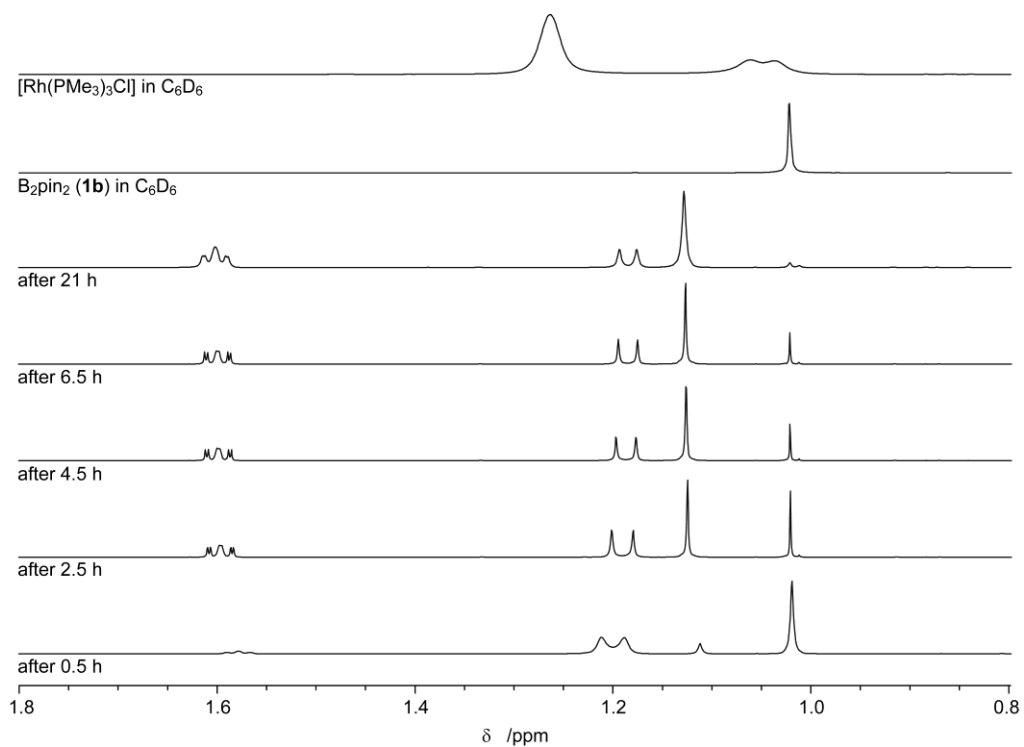

**Figure S1b.4:** *In situ* <sup>1</sup>H NMR spectra of the reaction of [Rh(PMe<sub>3</sub>)<sub>3</sub>Cl] with **1b** and spectra of **1b** and [Rh(PMe<sub>3</sub>)<sub>3</sub>Cl] for comparison (300.3 MHz, C<sub>6</sub>D<sub>6</sub>, rt).

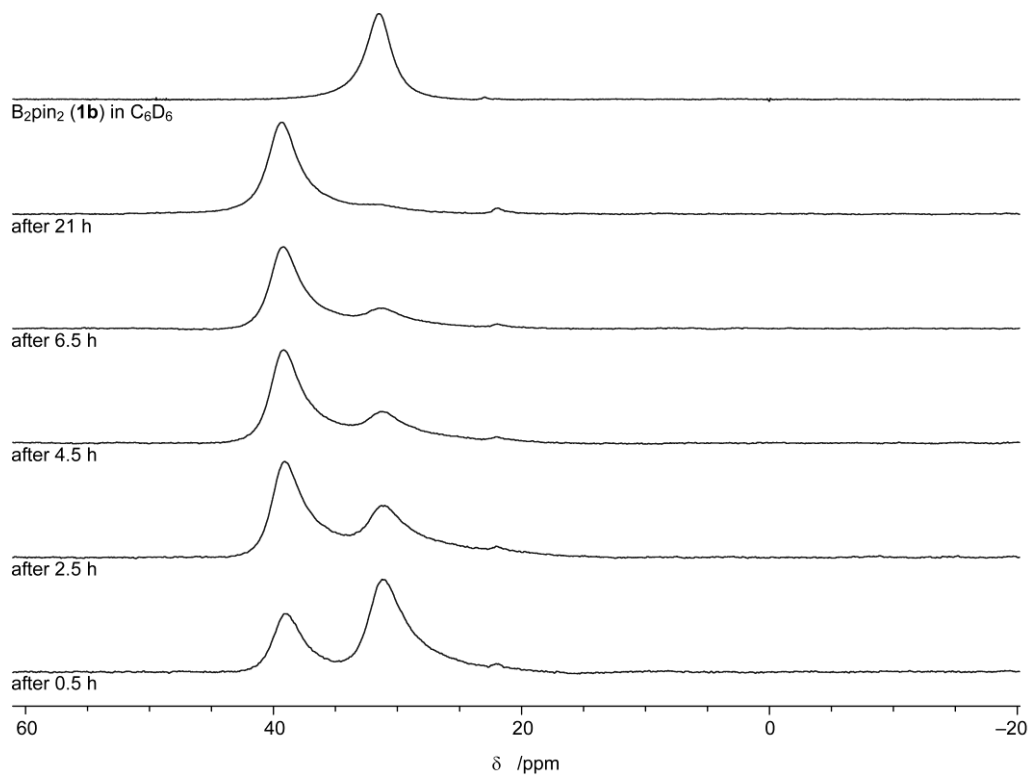

**Figure S1b.5:** *In situ* <sup>11</sup>B{<sup>1</sup>H} NMR spectra of the reaction of [Rh(PMe<sub>3</sub>)<sub>3</sub>Cl] with **1b** and a spectrum of **1b** for comparison (96.3MHz, C<sub>6</sub>D<sub>6</sub>, rt).

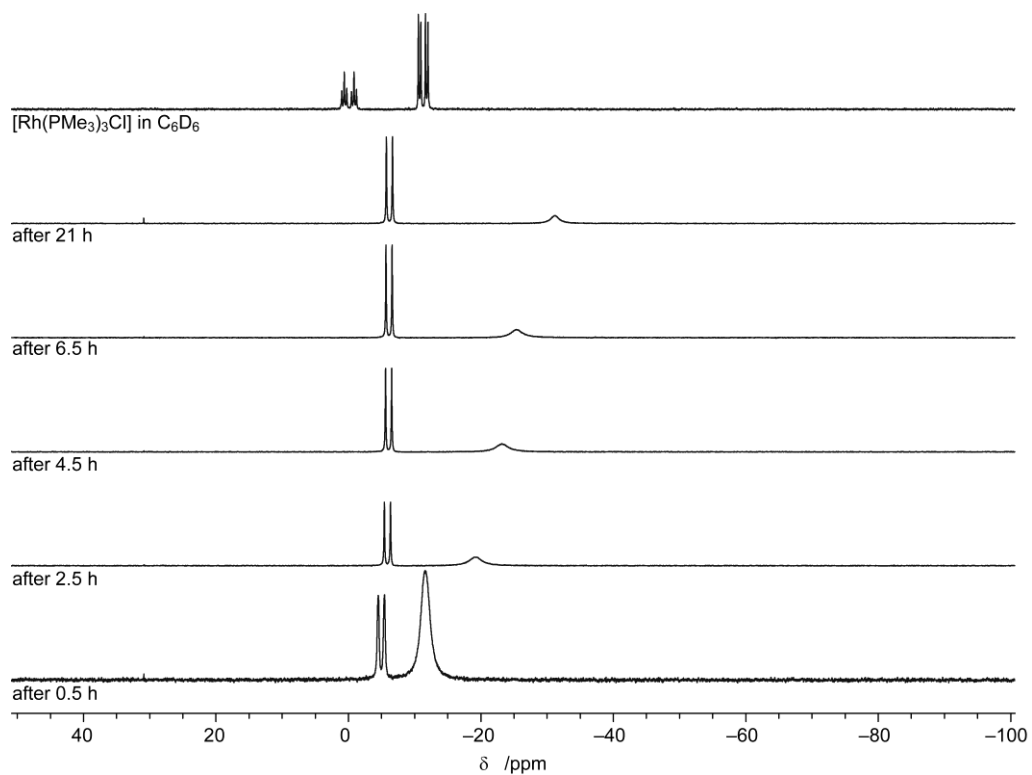

**Figure S1b.6:** *In situ*  $^{31}\text{P}\{^1\text{H}\}$  NMR spectra of the reaction of  $[\text{Rh}(\text{PMe}_3)_3\text{Cl}]$  with **1b** and a spectrum of  $[\text{Rh}(\text{PMe}_3)_3\text{Cl}]$  for comparison (121.5 MHz,  $\text{C}_6\text{D}_6$ , rt).

**$[\text{Rh}(\text{PMe}_3)_3\text{Cl}]$  with **1c****

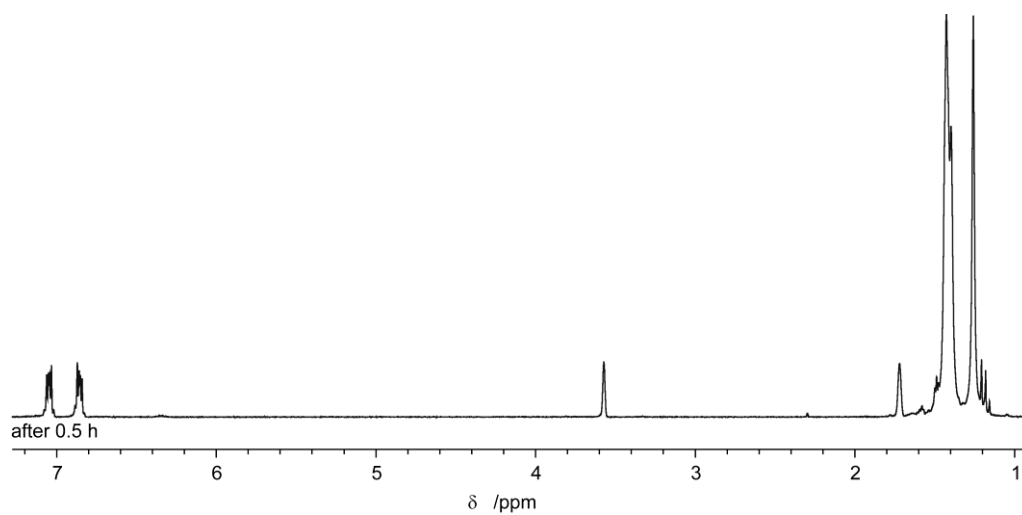

**Figure S1b.7:** *In situ*  $^1\text{H}$  NMR spectra of the reaction of  $[\text{Rh}(\text{PMe}_3)_3\text{Cl}]$  with **1c** (300.3 MHz,  $\text{THF-d}_8$ , rt).

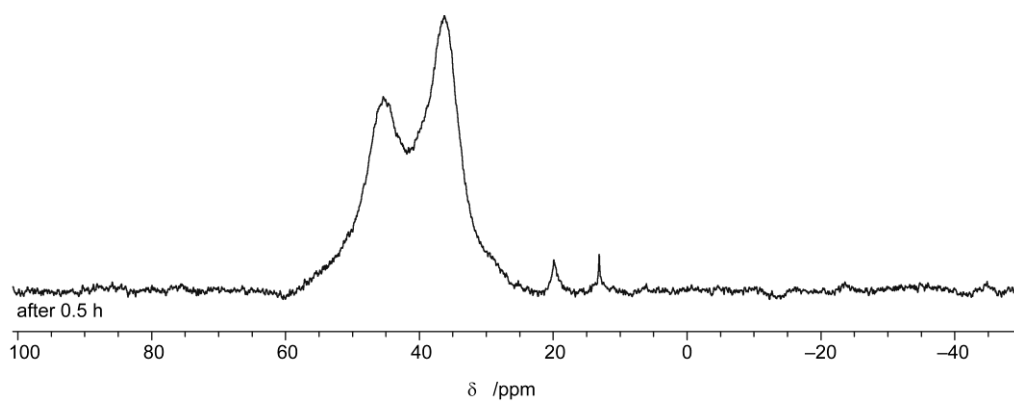

**Figure S1b.8:** *In situ*  $^{11}\text{B}\{^1\text{H}\}$  NMR spectra of the reaction of  $[\text{Rh}(\text{PMe}_3)_3\text{Cl}]$  with **1c** (96.3 MHz,  $\text{THF-d}_8$ , rt).

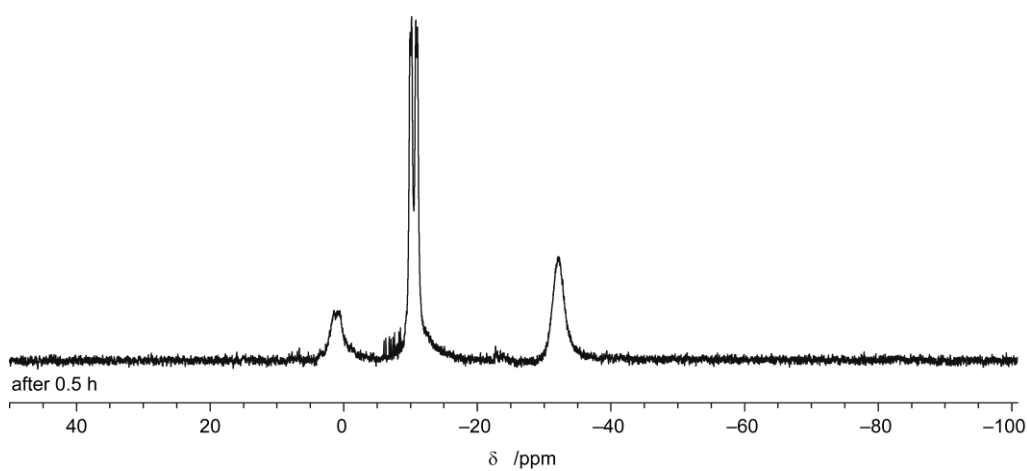

**Figure S1b.9:** *In situ*  $^{31}\text{P}\{^1\text{H}\}$  NMR spectra of the reaction of  $[\text{Rh}(\text{PMe}_3)_3\text{Cl}]$  with **1c** (121.5 MHz,  $\text{THF-d}_8$ , rt).

**[Rh(PMe<sub>3</sub>)<sub>3</sub>Cl] with 1d**

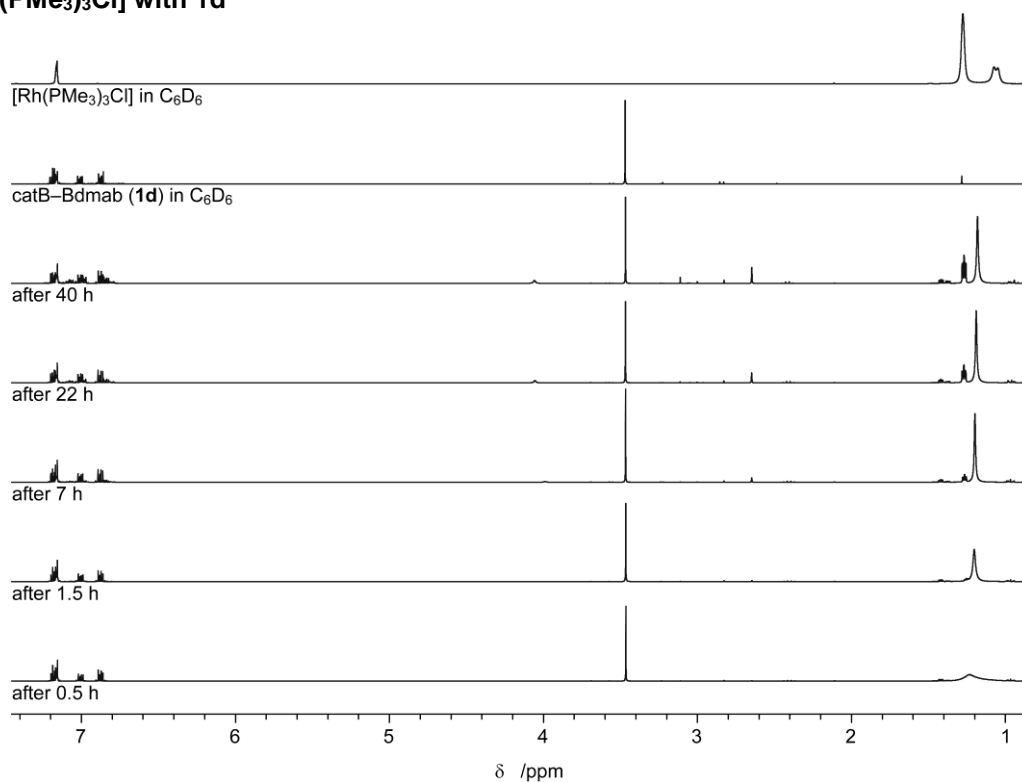

**Figure S1b.10:** *In situ* <sup>1</sup>H NMR spectra of the reaction of [Rh(PMe<sub>3</sub>)<sub>3</sub>Cl] with **1d** and spectra of **1d** and [Rh(PMe<sub>3</sub>)<sub>3</sub>Cl] for comparison (300.3 MHz, C<sub>6</sub>D<sub>6</sub>, rt).

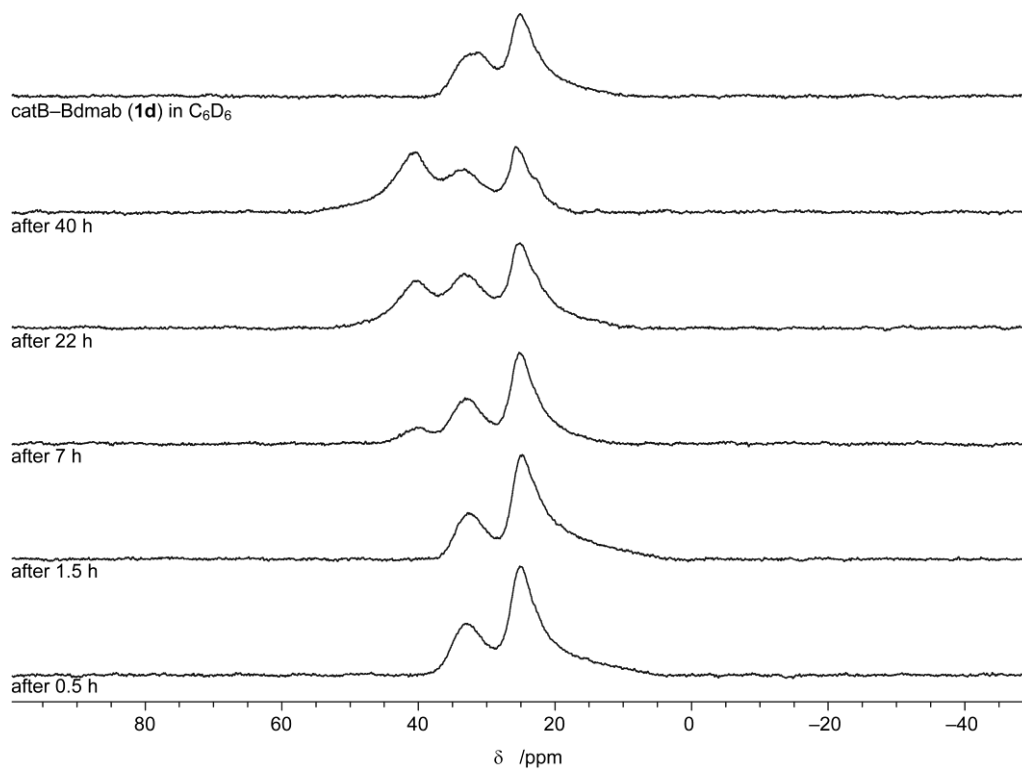

**Figure S1b.11:** *In situ* <sup>11</sup>B{<sup>1</sup>H} NMR spectra of the reaction of [Rh(PMe<sub>3</sub>)<sub>3</sub>Cl] with **1d** and a spectrum of **1d** for comparison (96.3 MHz, C<sub>6</sub>D<sub>6</sub>, rt).



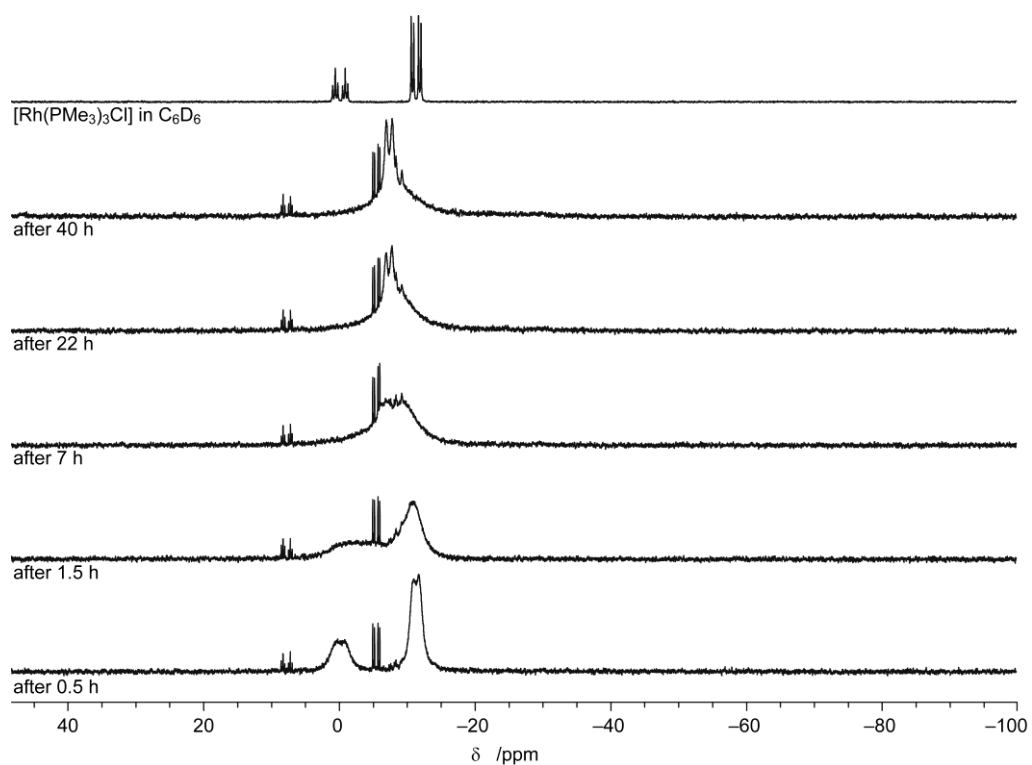

**Figure S1b.12:** *In situ* <sup>31</sup>P{<sup>1</sup>H} NMR spectra of the reaction of [Rh(PMe<sub>3</sub>)<sub>3</sub>Cl] with **1d** and a spectrum of [Rh(PMe<sub>3</sub>)<sub>3</sub>Cl] for comparison (121.5 MHz, C<sub>6</sub>D<sub>6</sub>, rt).

**[Rh(PMe<sub>3</sub>)<sub>3</sub>Cl] with 1e**

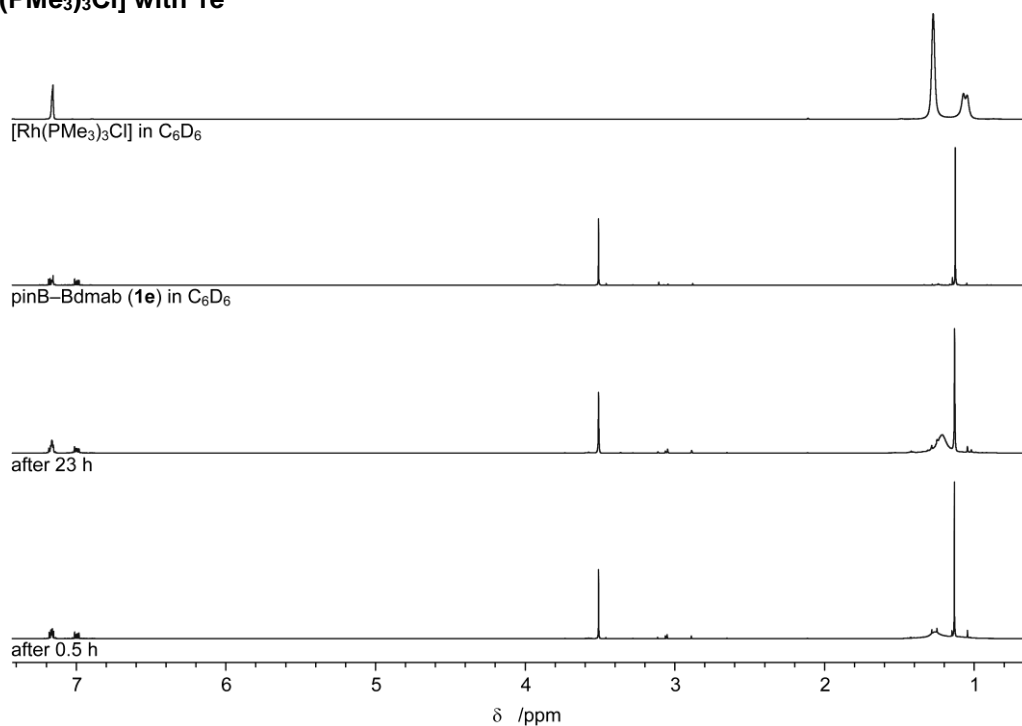

**Figure S1b.13:** *In situ* <sup>1</sup>H NMR spectra of the reaction of [Rh(PMe<sub>3</sub>)<sub>3</sub>Cl] with **1e** and spectra of **1e** and [Rh(PMe<sub>3</sub>)<sub>3</sub>Cl] for comparison (300.3 MHz, C<sub>6</sub>D<sub>6</sub>, rt).

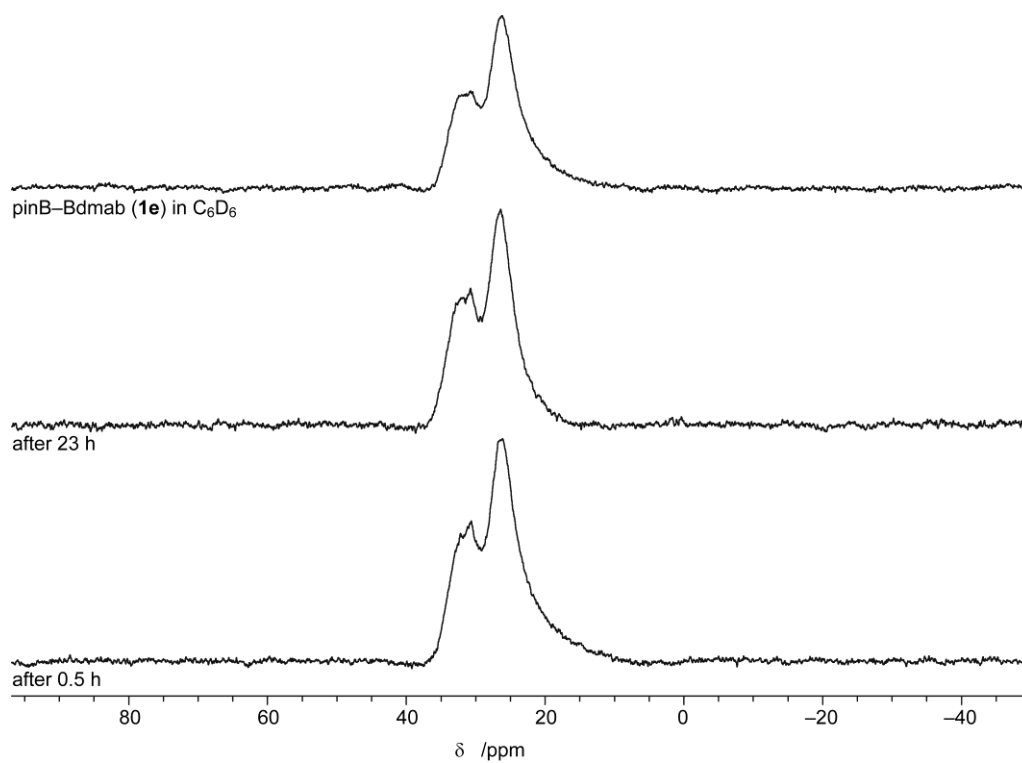

**Figure S1b.14:** *In situ* <sup>11</sup>B{<sup>1</sup>H} NMR spectra of the reaction of [Rh(PMe<sub>3</sub>)<sub>3</sub>Cl] with **1e** and a spectrum of **1e** for comparison (96.3 MHz, C<sub>6</sub>D<sub>6</sub>, rt).

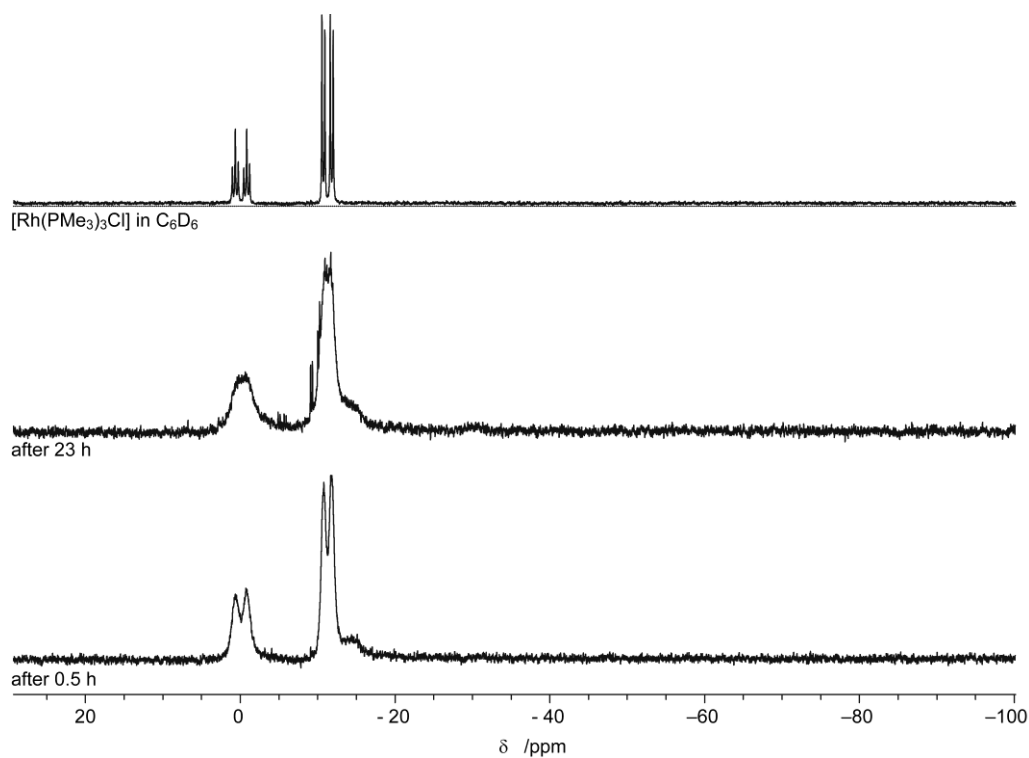

**Figure S1b.15:** *In situ* <sup>31</sup>P{<sup>1</sup>H} NMR spectra of the reaction of [Rh(PMe<sub>3</sub>)<sub>3</sub>Cl] with **1e** and a spectrum of [Rh(PMe<sub>3</sub>)<sub>3</sub>Cl] for comparison (121.5 MHz, C<sub>6</sub>D<sub>6</sub>, rt).

**[Rh(PMe<sub>3</sub>)<sub>3</sub>(Bpin)<sub>2</sub>Cl] (2b) + PMe<sub>3</sub>**

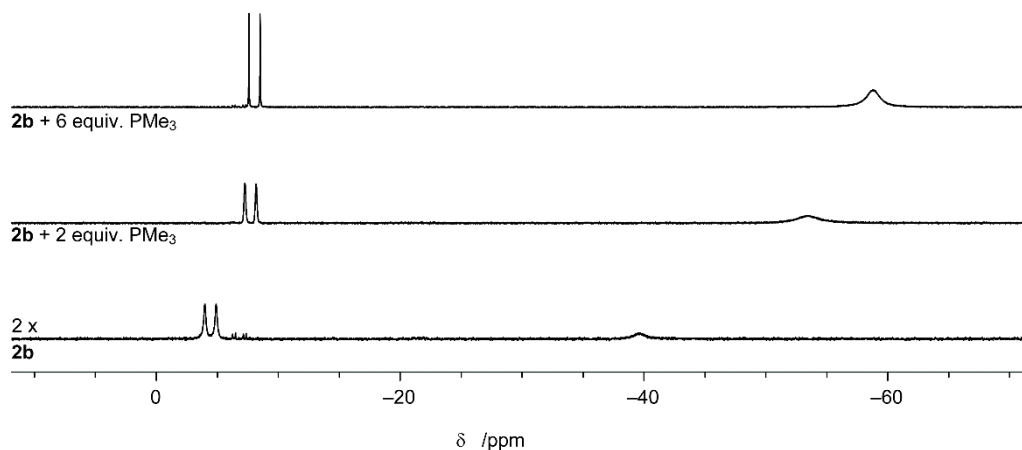

**Figure S1b.16:** <sup>31</sup>P{<sup>1</sup>H} NMR spectra of [Rh(PMe<sub>3</sub>)<sub>3</sub>(Bpin)<sub>2</sub>Cl] (**2b**) with different amounts of PMe<sub>3</sub> added (121.5 MHz, C<sub>6</sub>D<sub>6</sub>, rt).

The observed chemical shifts of 53.5 ppm with 2 equiv. PMe<sub>3</sub> and 58.8 ppm with 6 equiv. PMe<sub>3</sub> added are well described by the weighted averaged chemical shifts of the *trans*-B PMe<sub>3</sub> ligand in **2b**, ( $\delta_{2b} = -37.9$  ppm in C<sub>6</sub>D<sub>6</sub>) and the chemical shift of free PMe<sub>3</sub> ( $\delta_{\text{PMe}_3} = -62$  ppm):

$$\delta_{av} = \frac{\delta_{2b} + \delta_{\text{PMe}_3}}{n_{2b} + n_{\text{PMe}_3}}$$

Resulting in:  $\delta_{av} = 54.0$  ppm for 2 equiv. PMe<sub>3</sub>  
 $\delta_{av} = 58.6$  ppm for 6 equiv. PMe<sub>3</sub>

### 1.c. VT-NMR spectra of 2a–c, 3b

[Rh(PMe<sub>3</sub>)<sub>3</sub>(Bcat)<sub>2</sub>Cl] (2a)

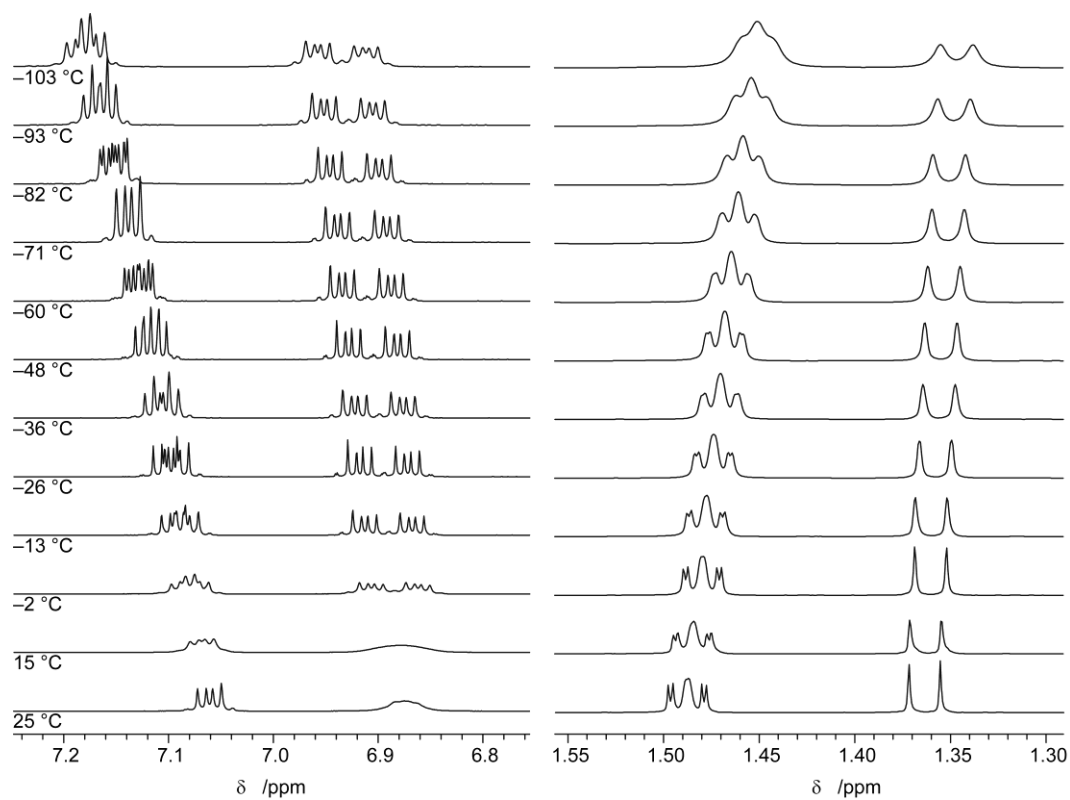

**Figure S1c.1:** VT-<sup>1</sup>H NMR spectra of 2a (400.4 MHz, THF-d<sub>8</sub>).

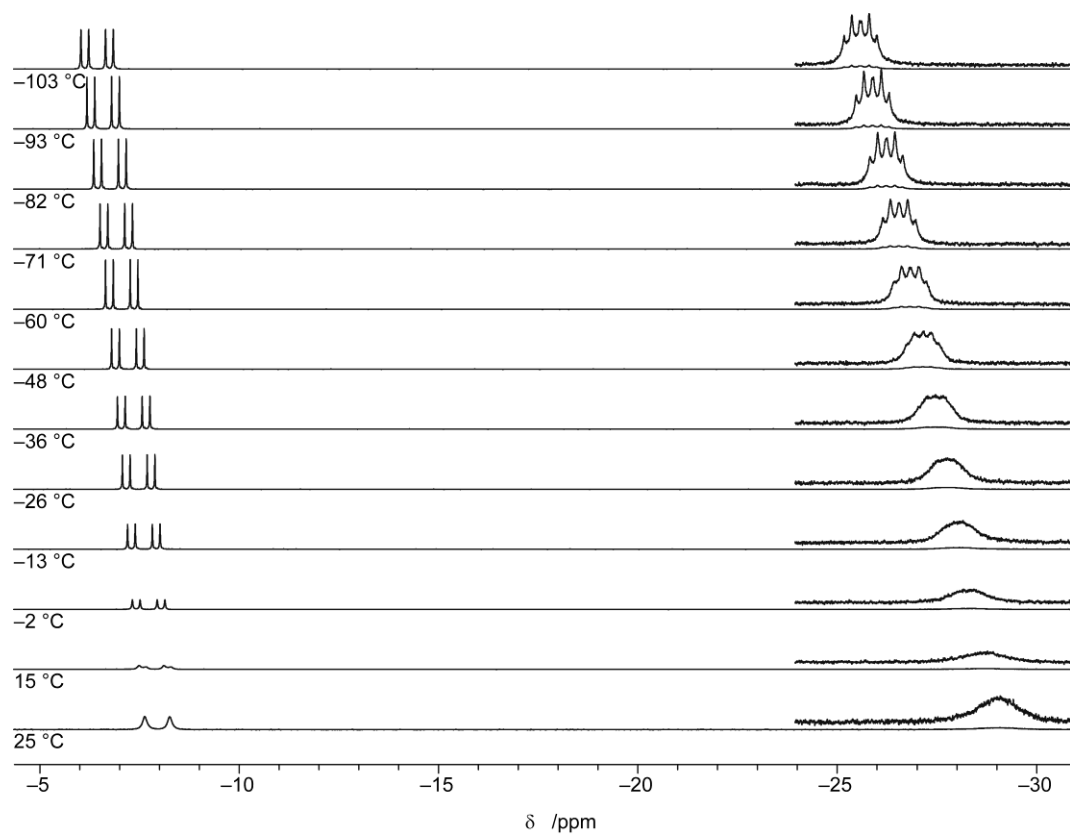

**Figure S1c.2:** VT-<sup>31</sup>P{<sup>1</sup>H} NMR spectra of 2a (inset: x10) (162.1 MHz, THF-d<sub>8</sub>).

**[Rh(PMe<sub>3</sub>)<sub>3</sub>(Bpin)<sub>2</sub>Cl] (2b)**

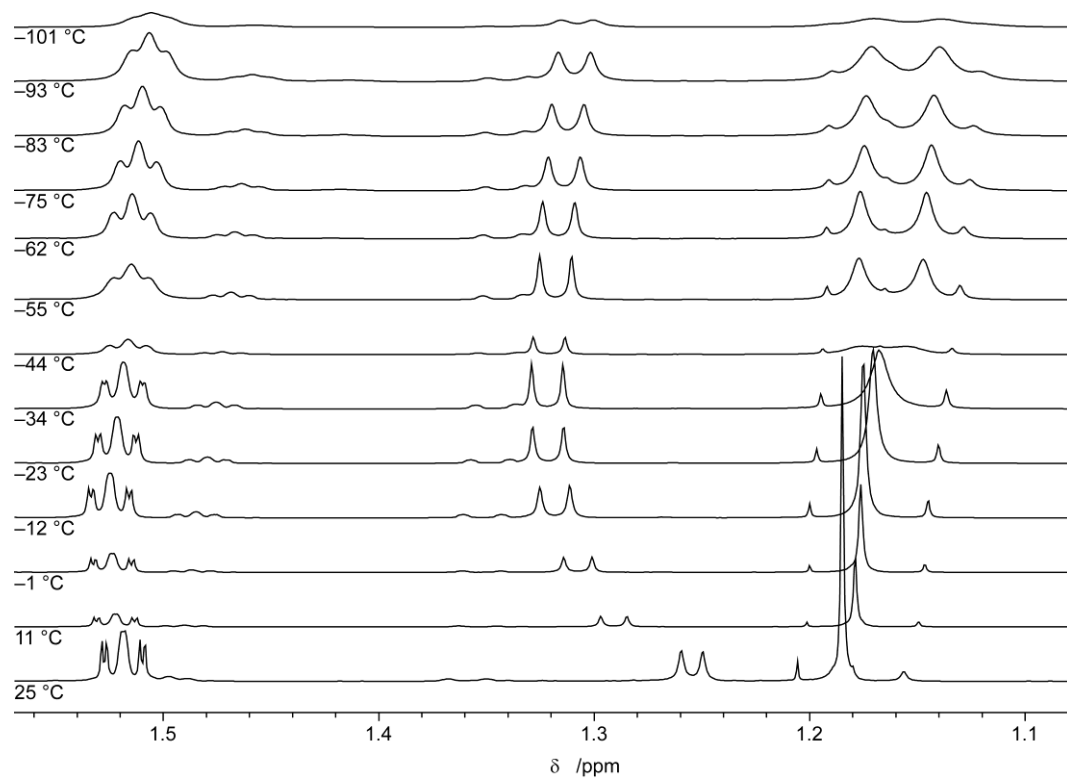

**Figure S1c.3:** VT-<sup>1</sup>H NMR spectra of **2b** (400.4 MHz, THF-d<sub>8</sub>).

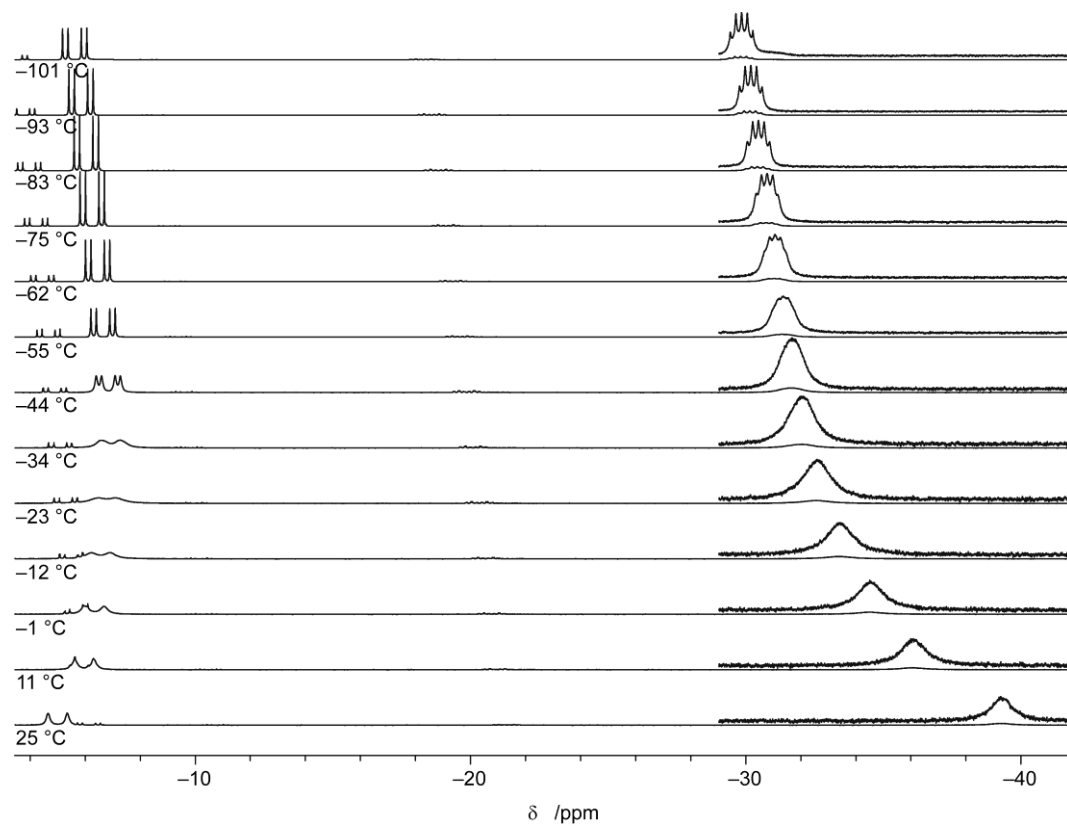

**Figure S1c.4:** VT-<sup>31</sup>P{<sup>1</sup>H} NMR spectra of **2b** (inset: x14) (162.1 MHz, THF-d<sub>8</sub>).

**[Rh(PMe<sub>3</sub>)<sub>3</sub>(Bpin)<sub>2</sub>Cl] (3b)**

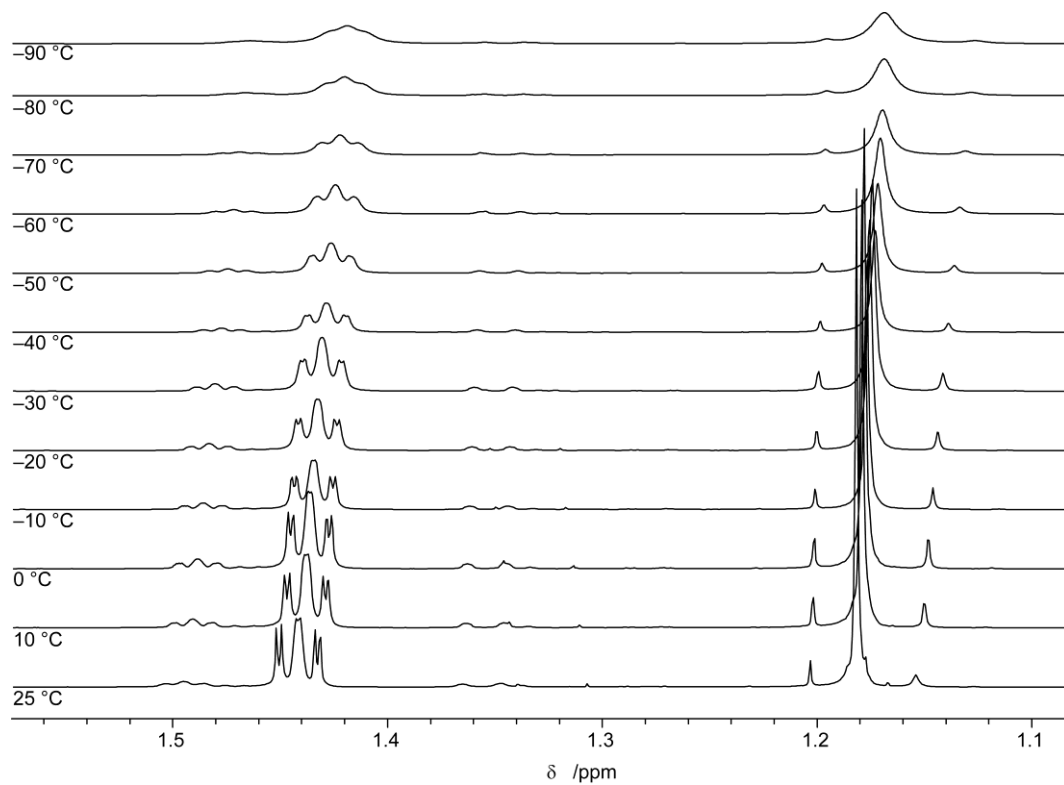

**Figure S1c.5:** VT-<sup>1</sup>H NMR spectra of **3b** (400.4 MHz, THF-d<sub>8</sub>).

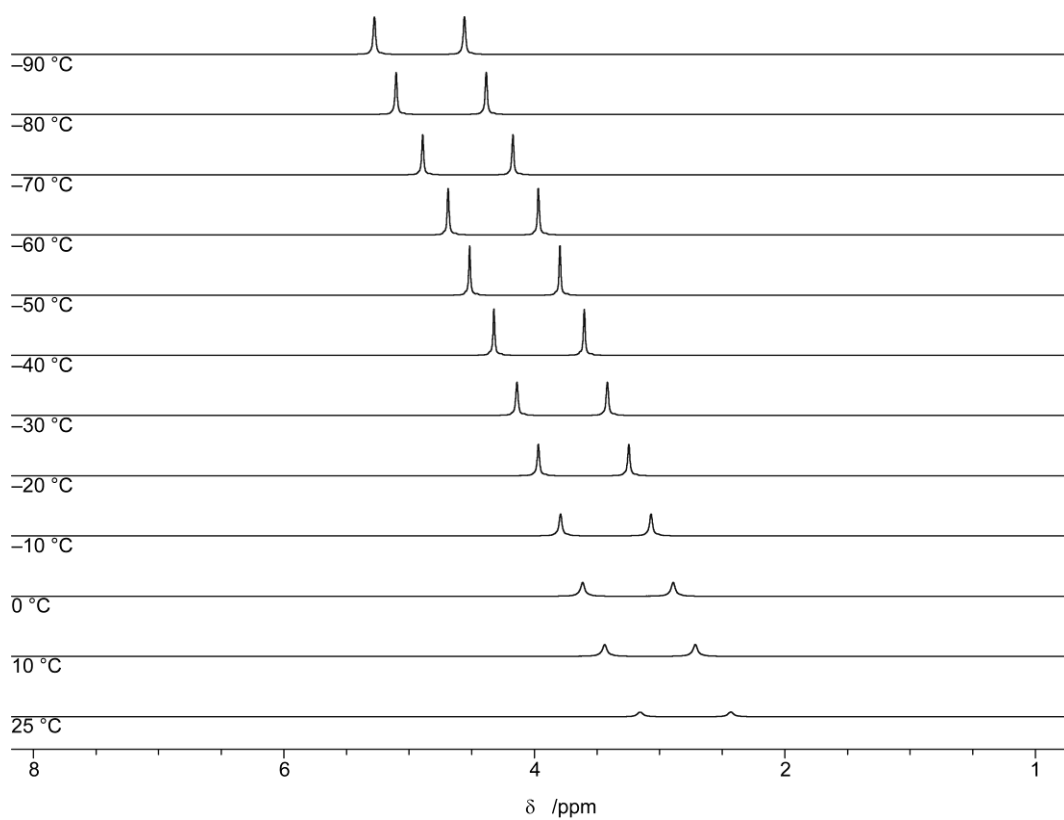

**Figure S1c.6:** VT-<sup>31</sup>P{<sup>1</sup>H} NMR spectra of **3b** (162.1 MHz, THF-d<sub>8</sub>).

**[Rh(PMe<sub>3</sub>)<sub>3</sub>(Bpin)<sub>2</sub>Cl] · [Rh(PMe<sub>3</sub>)<sub>2</sub>(Bpin)<sub>2</sub>Cl] (2b·3b)**

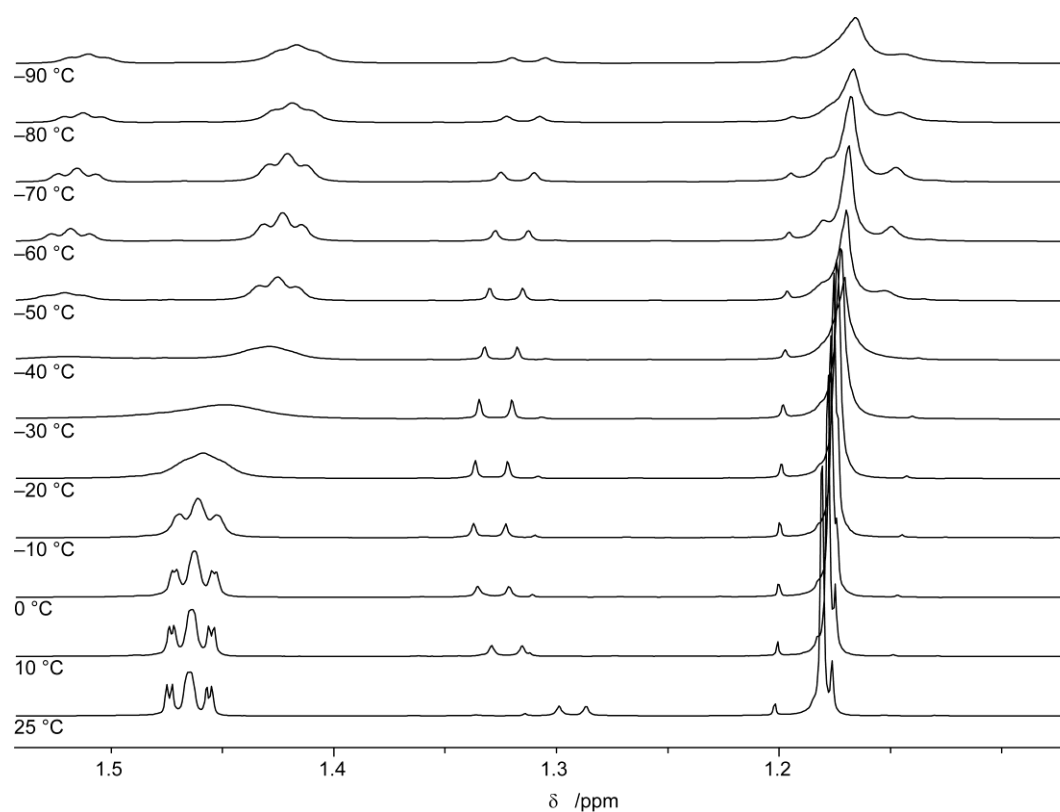

**Figure S1c.7:** VT-<sup>1</sup>H NMR spectra of **2b·3b** (400.4 MHz, THF-d<sub>8</sub>).

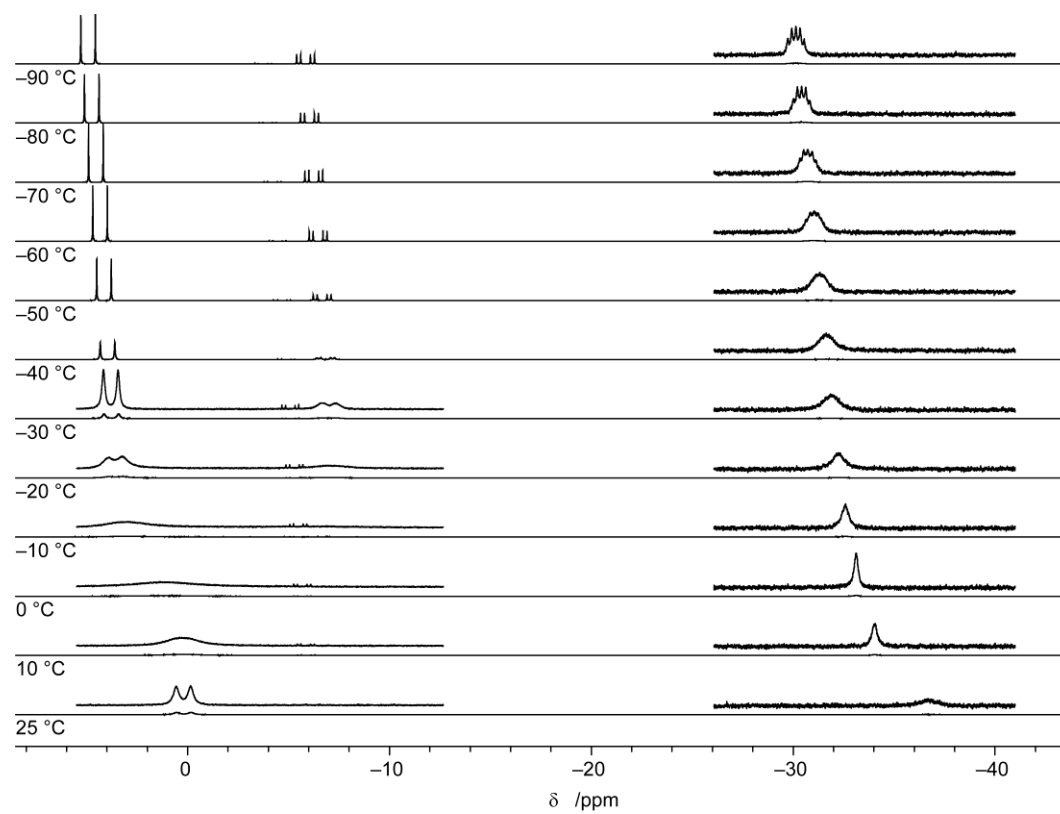

**Figure S1c.8:** VT-<sup>31</sup>P{<sup>1</sup>H} NMR spectra of **2b·3b** (left inset: x10, right inset: x32) (162.1 MHz, THF-d<sub>8</sub>).

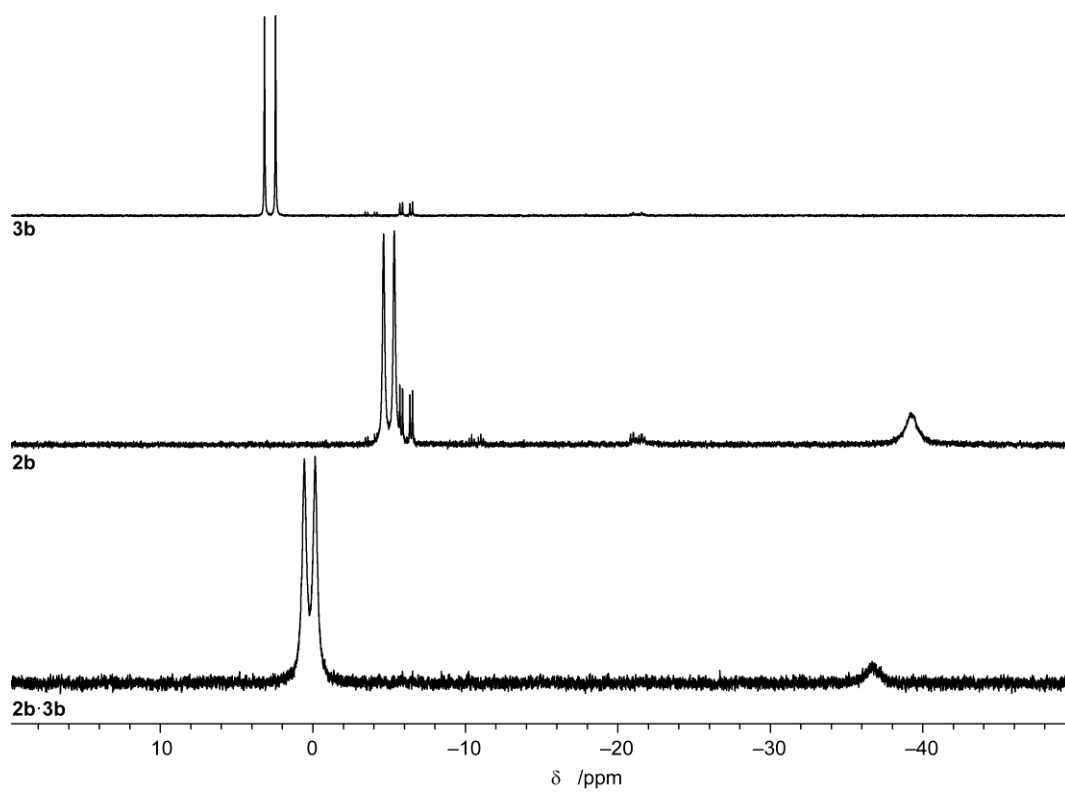

**Figure S1c.9:**  $^{31}\text{P}\{^1\text{H}\}$  NMR spectra of **2b·3b**, **2b** and **3b** at rt (162.1 MHz, THF- $d_8$ ).

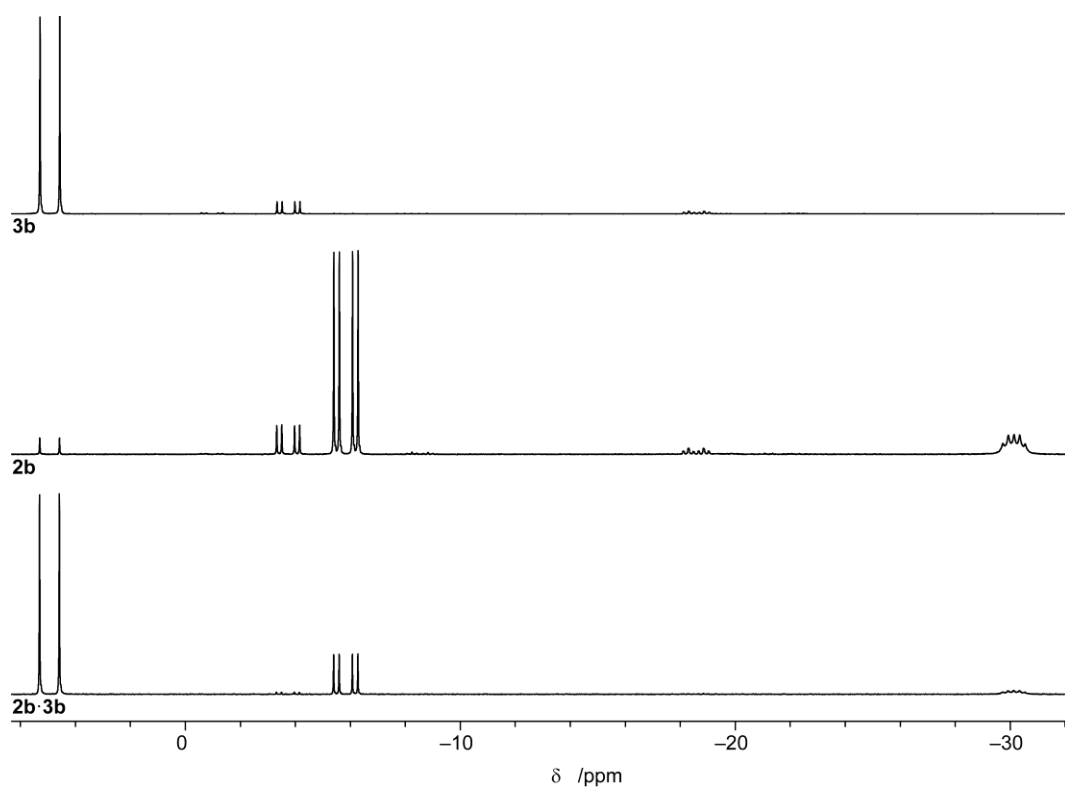

**Figure S1c.10:**  $^{31}\text{P}\{^1\text{H}\}$  NMR spectra of **2b·3b**, **2b** and **3b** at  $-90\text{ }^\circ\text{C}$  (162.1 MHz, THF- $d_8$ ).



**[Rh(PMe<sub>3</sub>)<sub>3</sub>(Bcat)(Bpin)Cl] (2c)**

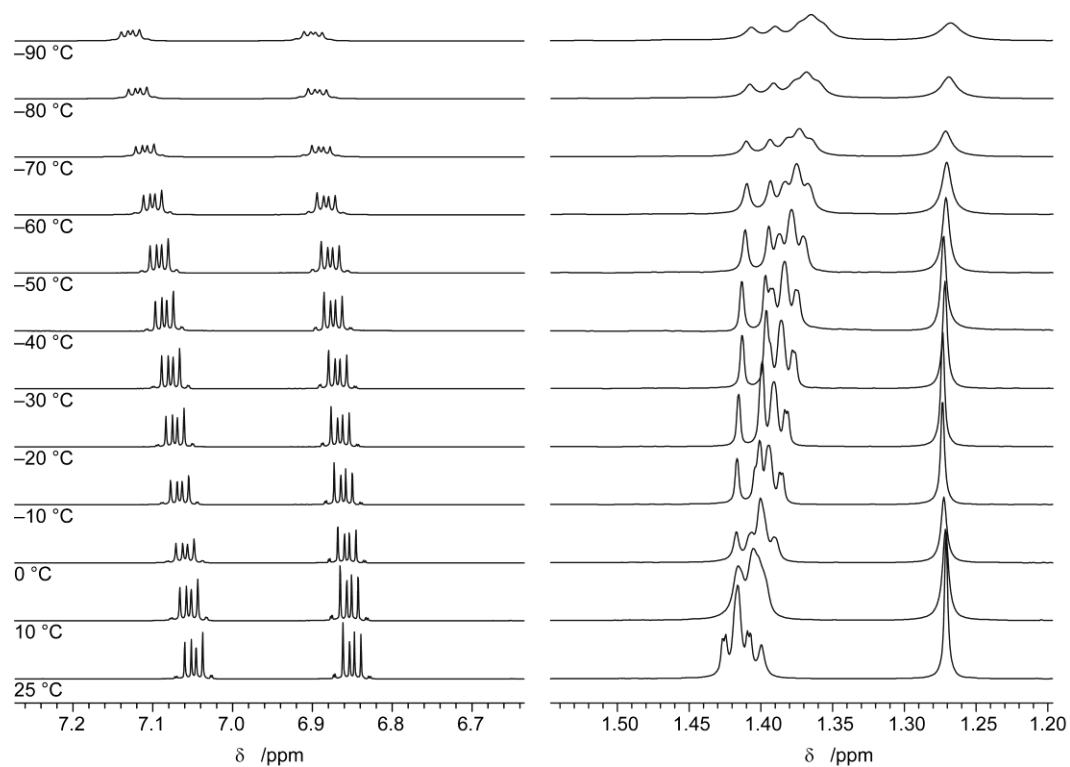

**Figure S1c.11:** VT-<sup>1</sup>H NMR spectra of **2c** (400.4 MHz, THF-d<sub>8</sub>).

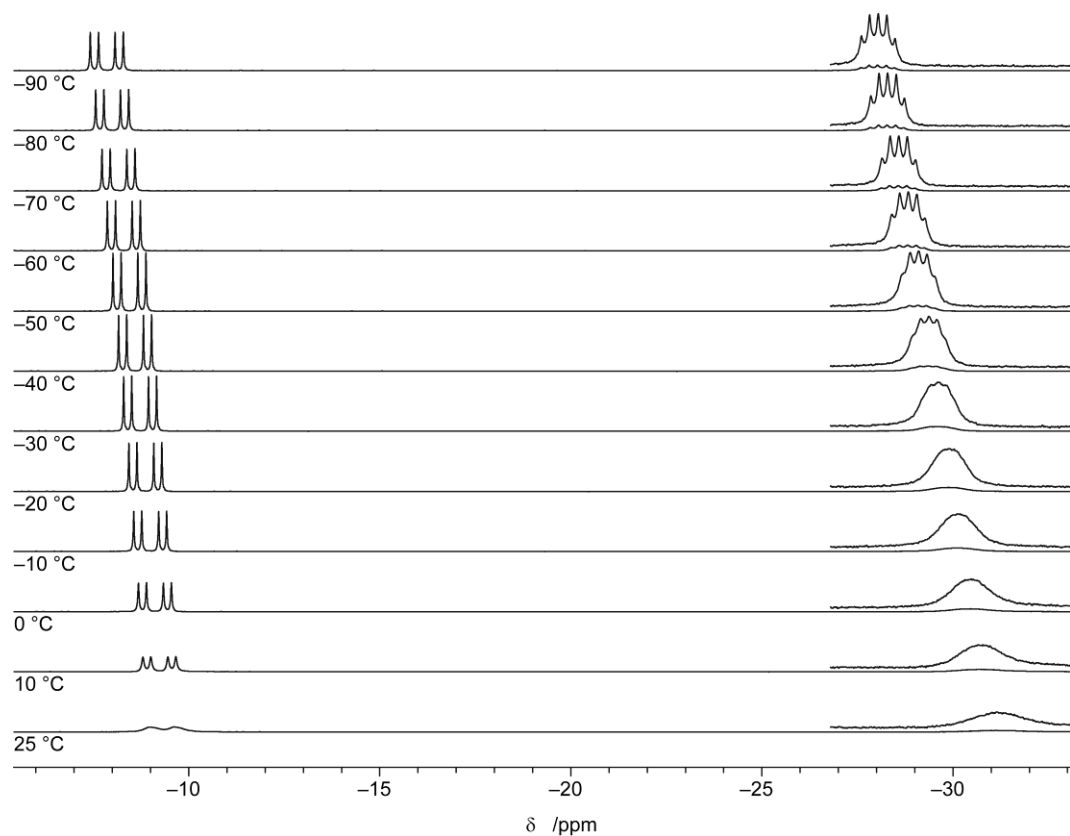

**Figure S1c.12:** VT-<sup>31</sup>P{<sup>1</sup>H} NMR spectra of **2c** (inset: ×10) (162.1 MHz, THF-d<sub>8</sub>).

### 1.d. VT-NMR spectra of 4a–c, 5c, 6c

#### [Rh(PMe<sub>3</sub>)<sub>4</sub>(Bcat)<sub>2</sub>][BARf] (4a)

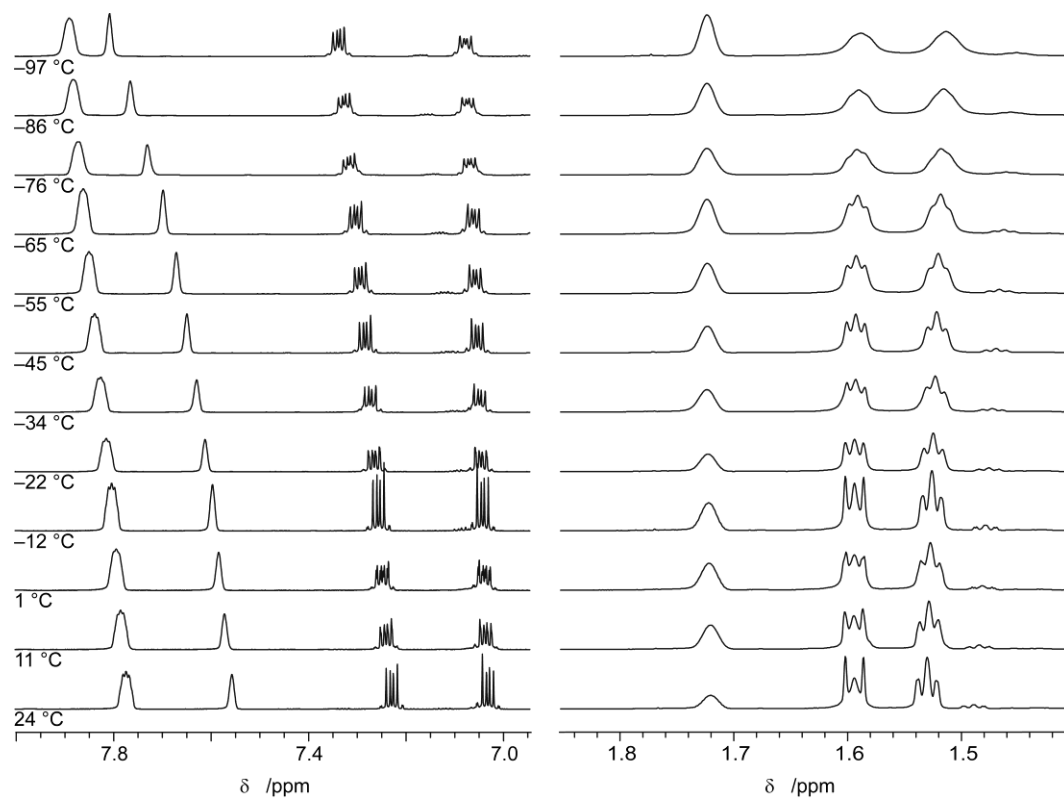

Figure S1d.1: VT-<sup>1</sup>H NMR spectra of 4a (400.4 MHz, THF-d<sub>8</sub>).

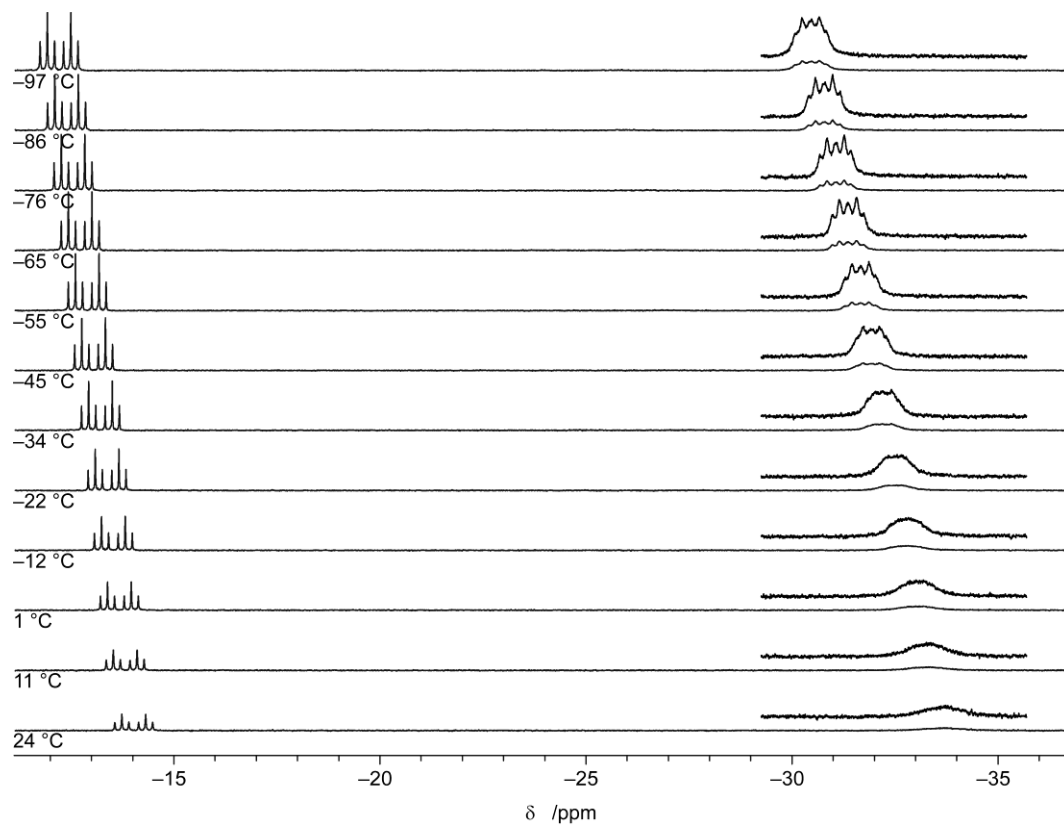

Figure S1d.2: VT-<sup>31</sup>P{<sup>1</sup>H} NMR spectra of 4a (inset: x5) (162.1 MHz, THF-d<sub>8</sub>).

**[Rh(PMe<sub>3</sub>)<sub>4</sub>(Bpin)<sub>2</sub>][BARf] (**4b**)**

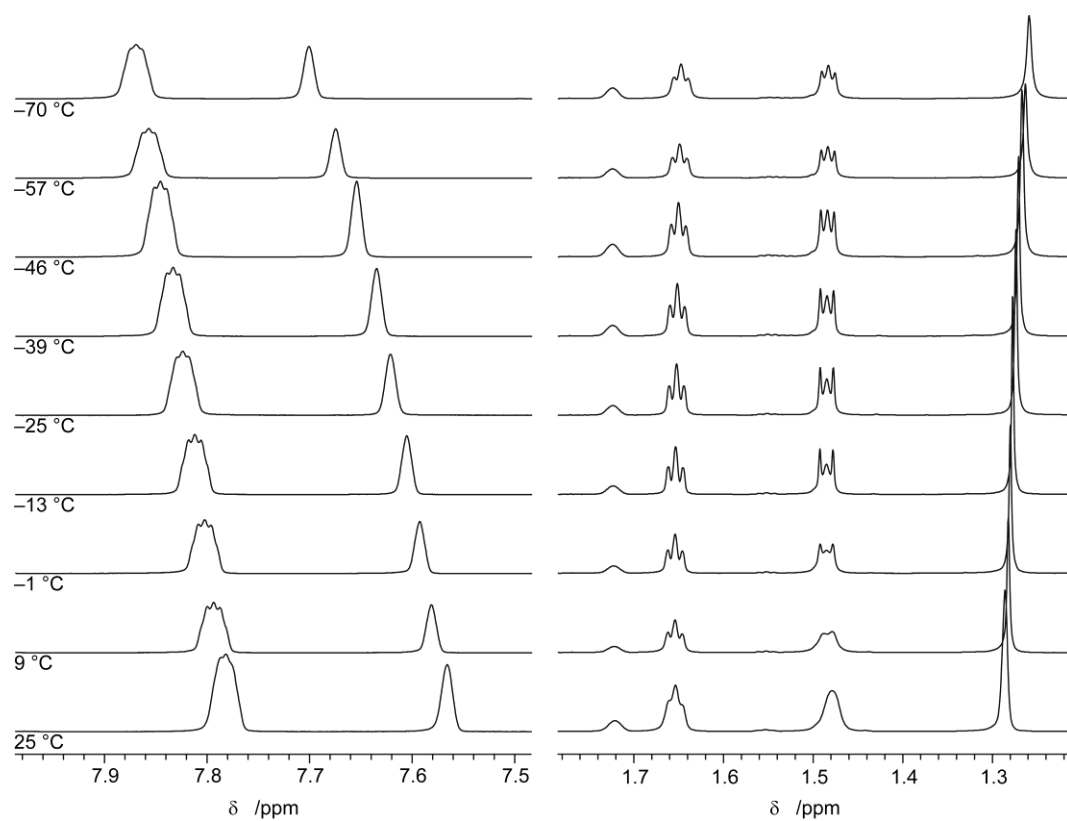

**Figure S1d.3:** VT-<sup>1</sup>H NMR spectra of **4b** (400.4 MHz, THF-d<sub>8</sub>).

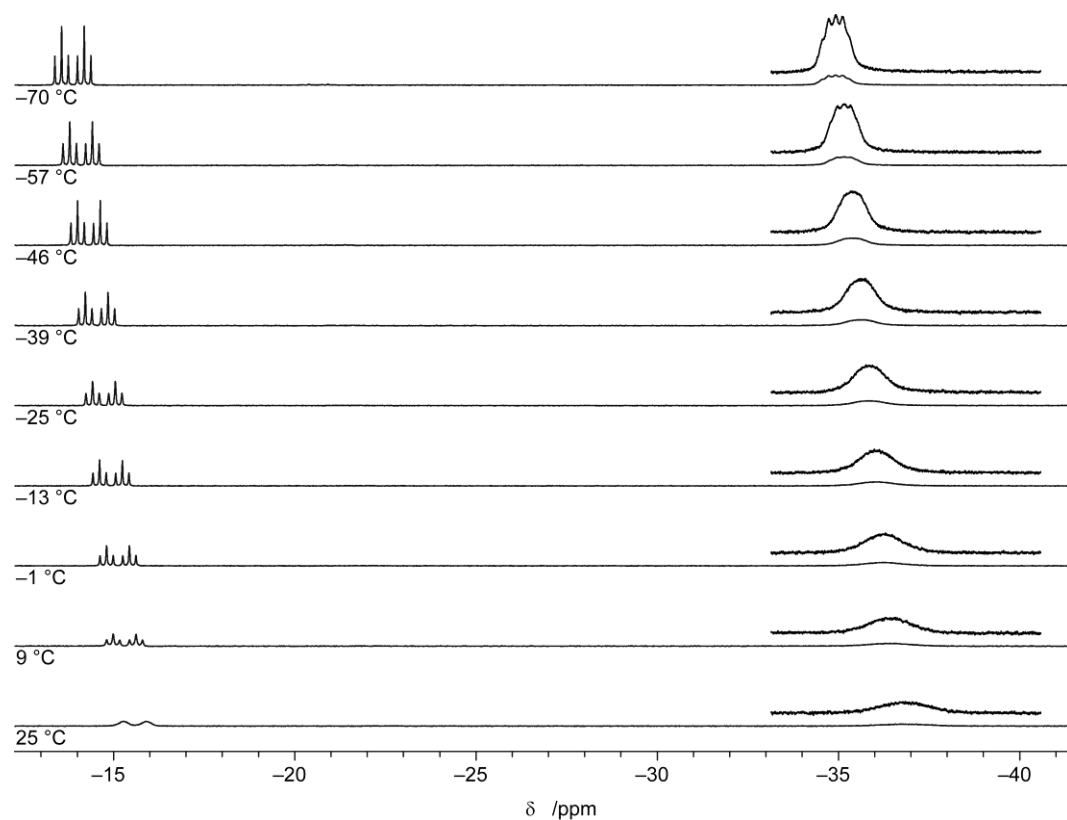

**Figure S1d.4:** VT-<sup>31</sup>P{<sup>1</sup>H} NMR spectra of **4b** (inset: x5) (162.1 MHz, THF-d<sub>8</sub>).

**[Rh(PMe<sub>3</sub>)<sub>4</sub>(Bcat)(Bpin)][BARf] (4c)**

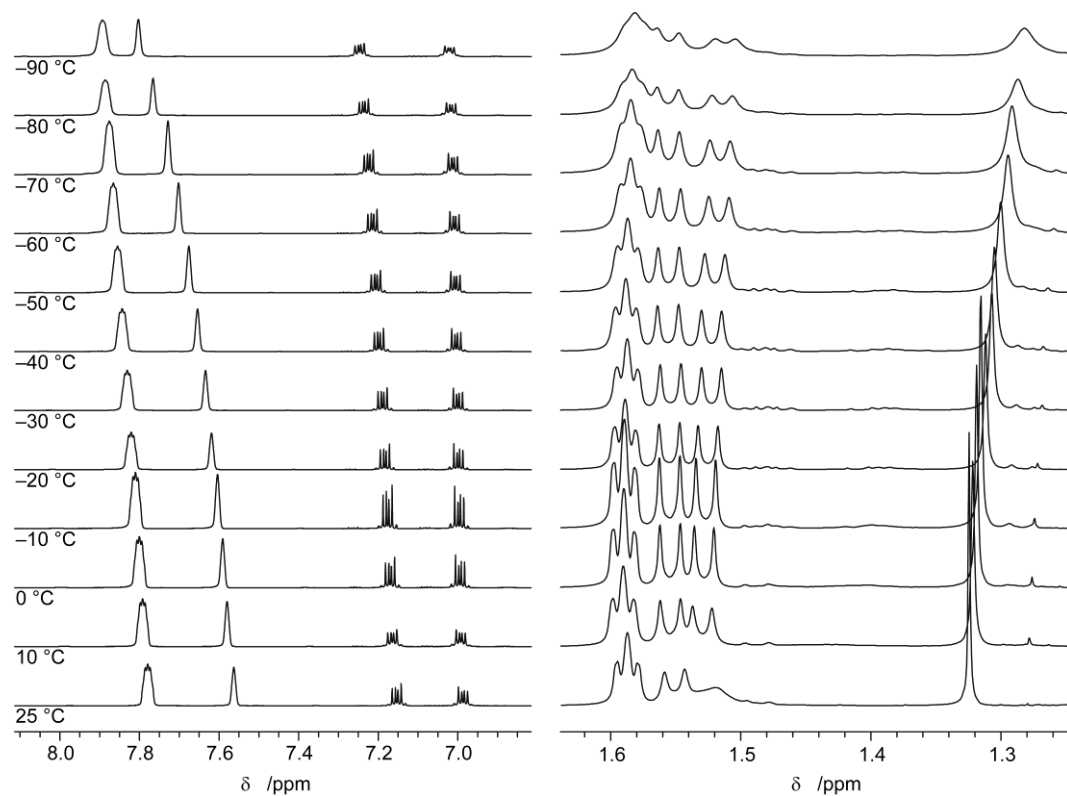

**Figure S1d.5:** VT-<sup>1</sup>H NMR spectra of **4c** (400.4 MHz, THF-d<sub>8</sub>).

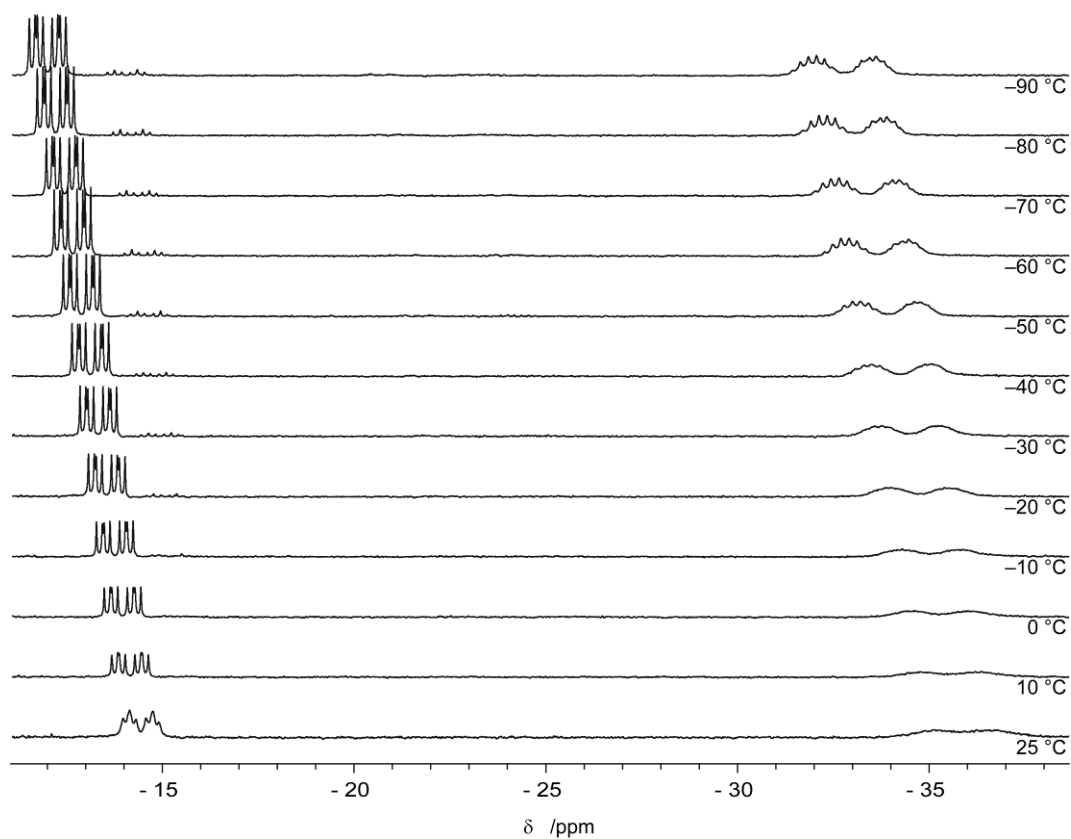

**Figure S1d.6:** VT-<sup>31</sup>P{<sup>1</sup>H} NMR spectra of **4c** (162.1 MHz, THF-d<sub>8</sub>).

**[Rh(PMe<sub>3</sub>)<sub>3</sub>(NCMe)(Bcat)(Bpin)][BARF] (5c)**

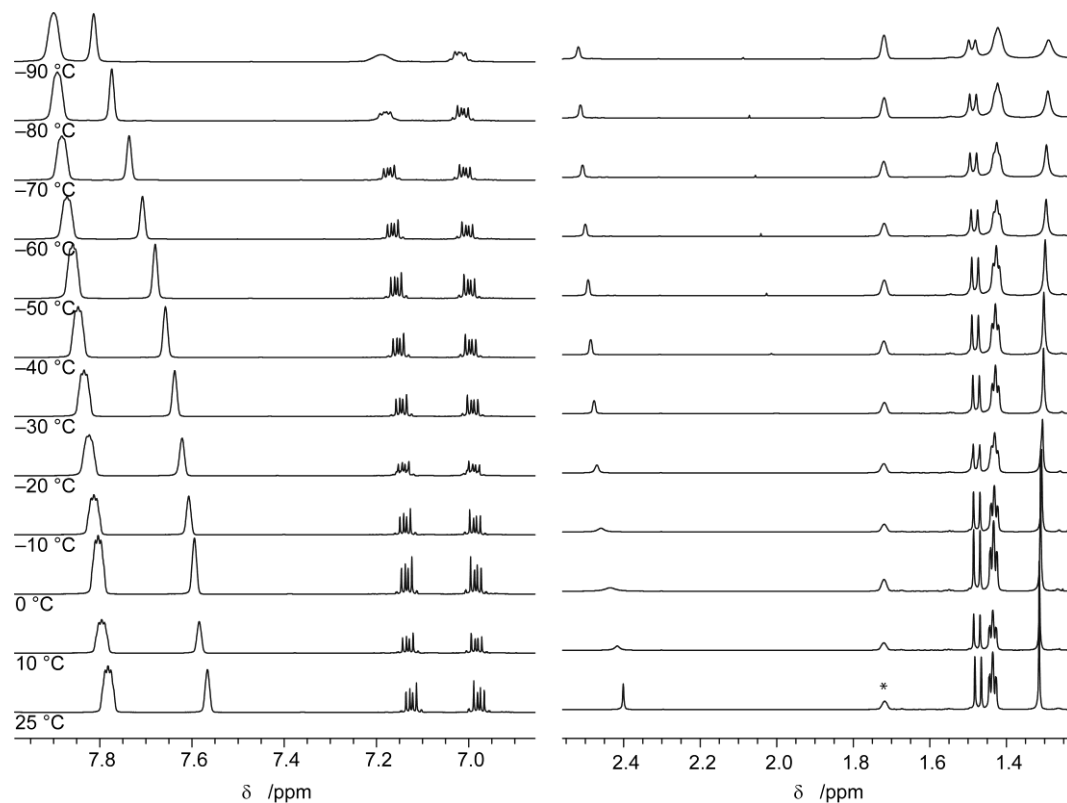

**Figure S1d.7:** VT-<sup>1</sup>H NMR spectra of [Rh(PMe<sub>3</sub>)<sub>3</sub>(NCMe)(Bcat)(Bpin)][BARF] (5c) (400.4 MHz, THF-d<sub>8</sub>, \* denotes the residual solvent signal).

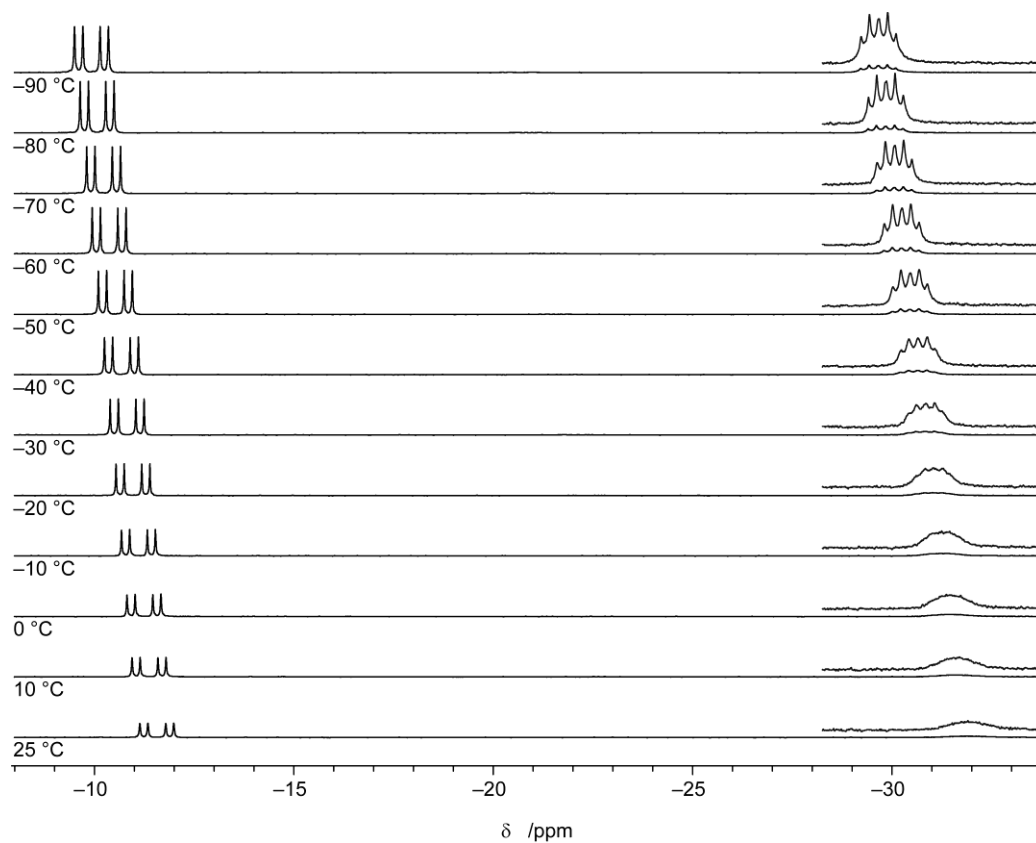

**Figure S1d.8:** VT-<sup>31</sup>P{<sup>1</sup>H} NMR spectra of [Rh(PMe<sub>3</sub>)<sub>3</sub>(NCMe)(Bcat)(Bpin)][BARF] (5c) (162.1 MHz, THF-d<sub>8</sub>).

**[Rh(PMe<sub>3</sub>)<sub>3</sub>(CNMe)(Bcat)(Bpin)][BARF] (6c)**

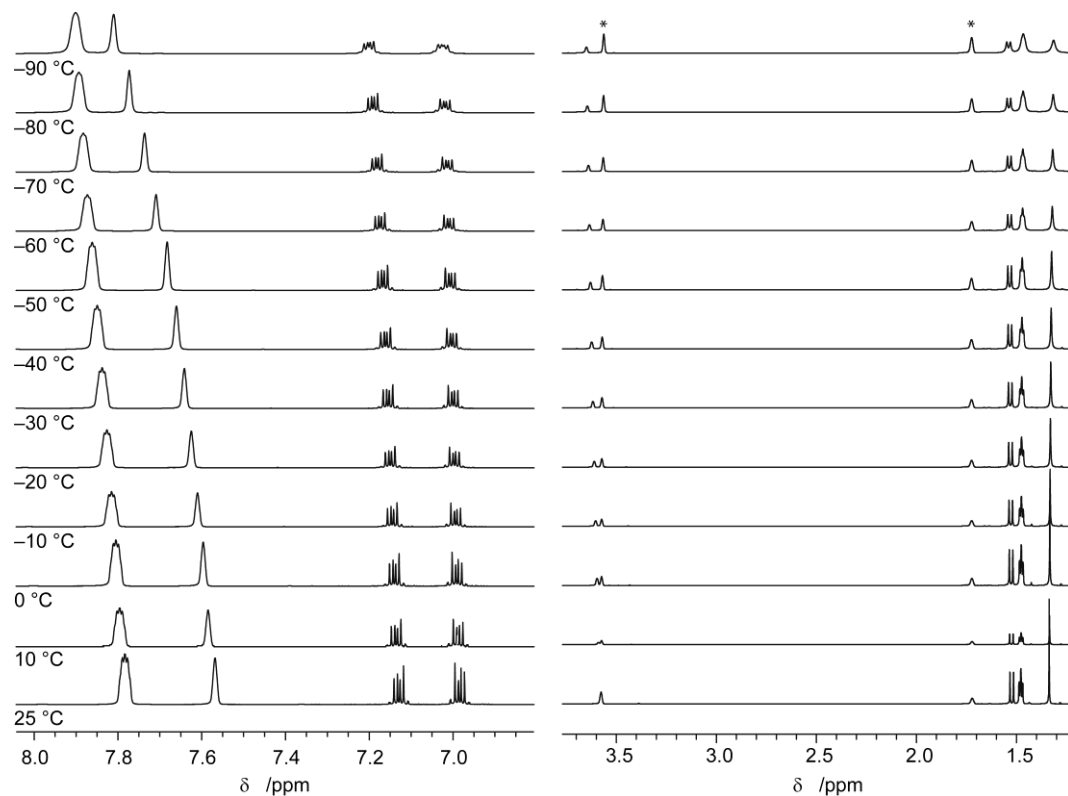

**Figure S1d.9:** VT-<sup>1</sup>H NMR spectra of [Rh(PMe<sub>3</sub>)<sub>3</sub>(CNMe)(Bcat)(Bpin)][BARF] (6c) (400.4 MHz, THF-d<sub>8</sub>, \* denotes the residual solvent signal).

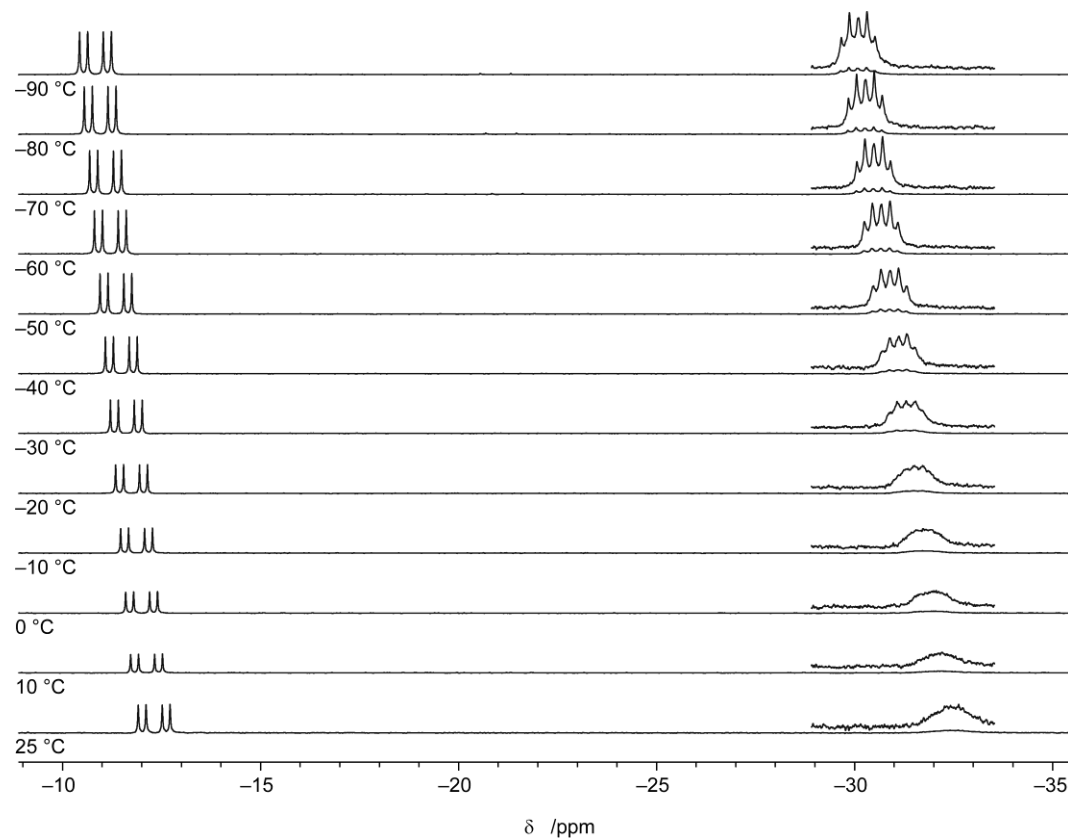

**Figure S1d.10:** VT-<sup>31</sup>P{<sup>1</sup>H} NMR spectra of [Rh(PMe<sub>3</sub>)<sub>3</sub>(CNMe)(Bcat)(Bpin)][BARF] (6c) (162.1 MHz, THF-d<sub>8</sub>).

## 2. Crystallographic Data

### 2.a. Crystallographic Data Collection Parameters

**Table S1** Crystallographic data collection parameters for [(Me<sub>3</sub>P)<sub>4</sub>RhH(Cl)][B(1,2-O<sub>2</sub>C<sub>6</sub>H<sub>4</sub>)<sub>2</sub>](THF), **2a** and **2b**(PhMe).

|                                                    | [(Me <sub>3</sub> P) <sub>4</sub> RhH(Cl)]<br>[B(1,2-O <sub>2</sub> C <sub>6</sub> H <sub>4</sub> ) <sub>2</sub> ](THF) <sup>a</sup>       | <b>2a</b>                                                                                      | <b>2b</b> (PhMe)                                                                                                 |
|----------------------------------------------------|--------------------------------------------------------------------------------------------------------------------------------------------|------------------------------------------------------------------------------------------------|------------------------------------------------------------------------------------------------------------------|
| Chemical Formula                                   | [C <sub>12</sub> H <sub>36</sub> ClP <sub>4</sub> Rh][C <sub>12</sub> H <sub>8</sub> BO <sub>4</sub> ],<br>C <sub>4</sub> H <sub>8</sub> O | C <sub>21</sub> H <sub>35</sub> B <sub>2</sub> ClO <sub>4</sub> P <sub>3</sub> Rh              | C <sub>21</sub> H <sub>51</sub> B <sub>2</sub> ClO <sub>4</sub> P <sub>3</sub> Rh, C <sub>7</sub> H <sub>8</sub> |
| Formula mass (g mol <sup>-1</sup> )                | 741.74                                                                                                                                     | 604.38                                                                                         | 712.64                                                                                                           |
| Crystal shape                                      | fragment                                                                                                                                   | plate                                                                                          | cuboid                                                                                                           |
| Crystal color                                      | clear pale yellow                                                                                                                          | clear colourless                                                                               | clear colourless                                                                                                 |
| Crystal size (mm <sup>3</sup> )                    | 0.088 × 0.061 × 0.038                                                                                                                      | 0.246 × 0.141 × 0.017                                                                          | 0.205 × 0.173 × 0.078                                                                                            |
| Temp., Radiation                                   | 100 K, CuKα                                                                                                                                | 100 K, MoKα                                                                                    | 100 K, MoKα                                                                                                      |
| Abs. coefficient (corr.)                           | 6.638 mm <sup>-1</sup> (gaussian)                                                                                                          | 0.936 mm <sup>-1</sup> (multi-scan)                                                            | 0.718 mm <sup>-1</sup> (multi-scan)                                                                              |
| Crystal system                                     | orthorhombic                                                                                                                               | monoclinic                                                                                     | monoclinic                                                                                                       |
| Space group type (no.)                             | <i>Pca</i> 2 <sub>1</sub> (29)                                                                                                             | <i>P</i> 2 <sub>1</sub> / <i>n</i> (14)                                                        | <i>C</i> 2/ <i>c</i> (15)                                                                                        |
| Z, Z'                                              | 8, 2                                                                                                                                       | 4, 1                                                                                           | 8, 1                                                                                                             |
| <i>a</i> (Å)                                       | 33.9797(7)                                                                                                                                 | 8.9802(1)                                                                                      | 32.6373(2)                                                                                                       |
| <i>b</i> (Å)                                       | 15.7885(4)                                                                                                                                 | 32.0928(6)                                                                                     | 9.7784(1)                                                                                                        |
| <i>c</i> (Å)                                       | 13.0676(3)                                                                                                                                 | 9.3574(2)                                                                                      | 22.3405(2)                                                                                                       |
| $\alpha$ (°)                                       | 90°                                                                                                                                        | 90°                                                                                            | 90°                                                                                                              |
| $\beta$ (°)                                        | 90°                                                                                                                                        | 92.003(2)°                                                                                     | 90.123(1)°                                                                                                       |
| $\gamma$ (°)                                       | 90°                                                                                                                                        | 90°                                                                                            | 90°                                                                                                              |
| Volume (Å <sup>3</sup> )                           | 7010.6(3)                                                                                                                                  | 2695.15(8)                                                                                     | 7129.7(1)                                                                                                        |
| Refl. collected                                    | 166289                                                                                                                                     | 217706                                                                                         | 1237740                                                                                                          |
| unique                                             | 14341                                                                                                                                      | 11930                                                                                          | 19482                                                                                                            |
| observed [ <i>I</i> > 2σ( <i>I</i> )]              | 12946                                                                                                                                      | 10966                                                                                          | 17697                                                                                                            |
| Data collection ranges                             | 3.09° < $\theta$ < 78.52°<br>-43 ≤ <i>h</i> ≤ 43<br>-19 ≤ <i>k</i> ≤ 17<br>-16 ≤ <i>l</i> ≤ 16                                             | 2.60° < $\theta$ < 35.08°<br>-14 ≤ <i>h</i> ≤ 14<br>-51 ≤ <i>k</i> ≤ 51<br>-15 ≤ <i>l</i> ≤ 15 | 2.80° < $\theta$ < 38.36°<br>-56 ≤ <i>h</i> ≤ 56<br>-16 ≤ <i>k</i> ≤ 16<br>-38 ≤ <i>l</i> ≤ 39                   |
| Completeness (to $\theta$ )                        | 97.7% (67.7°)                                                                                                                              | 100.0% (35.1°)                                                                                 | 99.8% (38.4°)                                                                                                    |
| Data / restr. / param.                             | 14341 / 1 / 746                                                                                                                            | 11930 / 0 / 298                                                                                | 19482 / 0 / 370                                                                                                  |
| <i>R</i> <sub>int</sub>                            | 0.1110                                                                                                                                     | 0.0556                                                                                         | 0.0702                                                                                                           |
| <i>R</i> <sub>1</sub> [ <i>I</i> > 2σ( <i>I</i> )] | 0.0680                                                                                                                                     | 0.0289                                                                                         | 0.0186                                                                                                           |
| <i>wR</i> <sub>2</sub> (all data)                  | 0.1987                                                                                                                                     | 0.0745                                                                                         | 0.0456                                                                                                           |
| GoF on F <sup>2</sup>                              | 1.055                                                                                                                                      | 1.172                                                                                          | 1.042                                                                                                            |
| Largest peak/hole (Å <sup>-3</sup> )               | 2.028 / -1.202                                                                                                                             | 1.441 / -1.771                                                                                 | 0.609 / -0.473                                                                                                   |
| Abs. struct. par. (Friedel cov.)                   | 0.482(2) (86.8%)                                                                                                                           | n/a                                                                                            | n/a                                                                                                              |
| CCDC no.                                           | 2129858                                                                                                                                    | 2129861                                                                                        | 2129871                                                                                                          |

a Due to crystal decomposition during the measurement a completeness of only 97% was obtained. The crystal was refined as a two-component inversion twin. Large unaccounted residual electron density is located at both rhodium atoms, possibly an effect of imperfect absorption correction using soft Cu radiation. However, no significant residual electron density was found in a position an expected hydrido ligand would occupy, but the presence of this additional hydrido ligand is proposed on the basis of analogy to the reported structure of [(Me<sub>3</sub>P)<sub>4</sub>RhH(Cl)][B(1,2-O<sub>2</sub>C<sub>6</sub>H<sub>4</sub>)<sub>2</sub>].<sup>S1</sup>

**Table S1 cont'd.** Crystallographic data collection parameters for **2c**(THF)<sub>½</sub>, **2b·3b** and **4a**(PhMe).

|                                                    | <b>2c</b> (THF) <sub>½</sub> <sup>a</sup>                                                                                         | <b>2b·3b</b>                                                                            | <b>4a</b> (PhMe)                                                                                                                                                         |
|----------------------------------------------------|-----------------------------------------------------------------------------------------------------------------------------------|-----------------------------------------------------------------------------------------|--------------------------------------------------------------------------------------------------------------------------------------------------------------------------|
| Chemical Formula                                   | C <sub>21</sub> H <sub>43</sub> B <sub>2</sub> ClO <sub>4</sub> P <sub>3</sub> Rh, (C <sub>4</sub> H <sub>8</sub> O) <sub>½</sub> | C <sub>19.5</sub> H <sub>46.5</sub> B <sub>2</sub> ClO <sub>4</sub> P <sub>2.5</sub> Rh | [C <sub>24</sub> H <sub>44</sub> B <sub>2</sub> O <sub>4</sub> P <sub>4</sub> Rh]<br>[C <sub>32</sub> H <sub>12</sub> BF <sub>24</sub> ](C <sub>7</sub> H <sub>8</sub> ) |
| Formula mass (g mol <sup>-1</sup> )                | 648.49                                                                                                                            | 582.47                                                                                  | 1600.36                                                                                                                                                                  |
| Crystal shape                                      | cuboid                                                                                                                            | block                                                                                   | rhombohedron                                                                                                                                                             |
| Crystal color                                      | clear colourless                                                                                                                  | clear colourless                                                                        | clear colourless                                                                                                                                                         |
| Crystal size (mm <sup>3</sup> )                    | 0.243 × 0.177 × 0.067                                                                                                             | 0.391 × 0.276 × 0.174                                                                   | 0.252 × 0.116 × 0.0035                                                                                                                                                   |
| Temp., Radiation                                   | 100 K, MoK <sub>α</sub>                                                                                                           | 100 K, MoK <sub>α</sub>                                                                 | 100 K, MoK <sub>α</sub>                                                                                                                                                  |
| Abs. coefficient (corr.)                           | 0.814 mm <sup>-1</sup> (numerical)                                                                                                | 0.857 mm <sup>-1</sup> (multi-scan)                                                     | 0.449 mm <sup>-1</sup> (gaussian)                                                                                                                                        |
| Crystal system                                     | orthorhombic                                                                                                                      | triclinic                                                                               | triclinic                                                                                                                                                                |
| Space group type (no.)                             | <i>Pbcn</i> (60)                                                                                                                  | <i>P</i> $\bar{1}$ (2)                                                                  | <i>P</i> $\bar{1}$ (2)                                                                                                                                                   |
| Z, Z'                                              | 8, 1                                                                                                                              | 8, 4                                                                                    | 2, 1                                                                                                                                                                     |
| a (Å)                                              | 34.795(1)                                                                                                                         | 17.6266(2)                                                                              | 13.0318(3)                                                                                                                                                               |
| b (Å)                                              | 13.2910(4)                                                                                                                        | 19.1196(2)                                                                              | 13.3464(3)                                                                                                                                                               |
| c (Å)                                              | 13.5036(4)                                                                                                                        | 19.3690(2)                                                                              | 20.4288(5)                                                                                                                                                               |
| α (°)                                              | 90°                                                                                                                               | 60.968(1)°                                                                              | 79.347(2)°                                                                                                                                                               |
| β (°)                                              | 90°                                                                                                                               | 85.334(1)°                                                                              | 86.005(2)°                                                                                                                                                               |
| γ (°)                                              | 90°                                                                                                                               | 85.987(1)°                                                                              | 83.375(2)°                                                                                                                                                               |
| Volume (Å <sup>3</sup> )                           | 6245.0(3)                                                                                                                         | 5685.0(1)                                                                               | 3464.3(1)                                                                                                                                                                |
| Refl. collected                                    | 183646                                                                                                                            | 559571                                                                                  | 270981                                                                                                                                                                   |
| unique                                             | 8329                                                                                                                              | 59685                                                                                   | 17205                                                                                                                                                                    |
| observed [ <i>I</i> > 2σ( <i>I</i> )]              | 6243                                                                                                                              | 50366                                                                                   | 15308                                                                                                                                                                    |
| Data collection ranges                             | 2.23° < θ < 29.36°<br>-46 ≤ h ≤ 47<br>-18 ≤ k ≤ 18<br>-18 ≤ l ≤ 18                                                                | 2.63° < θ < 38.29°<br>-30 ≤ h ≤ 29<br>-33 ≤ k ≤ 32<br>-33 ≤ l ≤ 33                      | 2.62° < θ < 28.28°<br>-17 ≤ h ≤ 17<br>-17 ≤ k ≤ 17<br>-27 ≤ l ≤ 27                                                                                                       |
| Completeness (to θ)                                | 99.9% (29.4°)                                                                                                                     | 99.8% (25.2°)                                                                           | 99.9% (28.3°)                                                                                                                                                            |
| Data / restr. / param.                             | 8329 / 96 / 339                                                                                                                   | 59685 / 0 / 1143                                                                        | 17205 / 0 / 905                                                                                                                                                          |
| <i>R</i> <sub>int</sub>                            | 0.1009                                                                                                                            | 0.0477                                                                                  | 0.0573                                                                                                                                                                   |
| <i>R</i> <sub>1</sub> [ <i>I</i> > 2σ( <i>I</i> )] | 0.0383                                                                                                                            | 0.0254                                                                                  | 0.0526                                                                                                                                                                   |
| <i>wR</i> <sub>2</sub> (all data)                  | 0.0913                                                                                                                            | 0.0593                                                                                  | 0.1392                                                                                                                                                                   |
| GoF on F <sup>2</sup>                              | 1.037                                                                                                                             | 1.057                                                                                   | 1.051                                                                                                                                                                    |
| Largest peak/hole (Å <sup>-3</sup> )               | 0.958 / -0.944                                                                                                                    | 0.964 / -0.680                                                                          | 2.016 / -1.119                                                                                                                                                           |
| Abs. struct. par. (Friedel cov.)                   | n/a                                                                                                                               | n/a                                                                                     | n/a                                                                                                                                                                      |
| CCDC no.                                           | 2129860                                                                                                                           | 2129866                                                                                 | 2129863                                                                                                                                                                  |

a DSR was used to model a disordered THF molecule.<sup>S2</sup> Additionally restraints (SADI, SIMU, RIGU, ISOR) were employed.



**Table S1 cont'd.** Crystallographic data collection parameters for **4b**, **4c(THF)** and **3b**.

|                                                             | <b>4b</b>                                                                                                                                | <b>4c(THF)</b>                                                                                                                                                            | <b>3b</b>                                                                                      |
|-------------------------------------------------------------|------------------------------------------------------------------------------------------------------------------------------------------|---------------------------------------------------------------------------------------------------------------------------------------------------------------------------|------------------------------------------------------------------------------------------------|
| Chemical Formula                                            | [C <sub>24</sub> H <sub>60</sub> B <sub>2</sub> O <sub>4</sub> P <sub>4</sub> Rh]<br>[C <sub>32</sub> H <sub>12</sub> BF <sub>24</sub> ] | [C <sub>24</sub> H <sub>52</sub> B <sub>2</sub> O <sub>4</sub> P <sub>4</sub> Rh]<br>[C <sub>32</sub> H <sub>12</sub> BF <sub>24</sub> ](C <sub>4</sub> H <sub>8</sub> O) | C <sub>18</sub> H <sub>42</sub> B <sub>2</sub> ClO <sub>4</sub> P <sub>2</sub> Rh              |
| Formula mass (g mol <sup>-1</sup> )                         | 1524.35                                                                                                                                  | 1588.39                                                                                                                                                                   | 544.43                                                                                         |
| Crystal shape                                               | fragment of plate                                                                                                                        | octahedral                                                                                                                                                                | needle                                                                                         |
| Crystal color                                               | clear colourless                                                                                                                         | clear colourless                                                                                                                                                          | clear colourless                                                                               |
| Crystal size (mm <sup>3</sup> )                             | 0.260 × 0.163 × 0.040                                                                                                                    | 0.190 × 0.113 × 0.105                                                                                                                                                     | 0.441 × 0.023 × 0.019                                                                          |
| Temp., Radiation                                            | 100 K, MoK $\alpha$                                                                                                                      | 100 K, MoK $\alpha$                                                                                                                                                       | 100 K, CuK $\alpha$                                                                            |
| Abs. coefficient (corr.)                                    | 0.463 mm <sup>-1</sup> (multi-scan)                                                                                                      | 0.446 mm <sup>-1</sup> (gaussian)                                                                                                                                         | 7.222 mm <sup>-1</sup> (gaussian)                                                              |
| Crystal system                                              | monoclinic                                                                                                                               | monoclinic                                                                                                                                                                | trigonal                                                                                       |
| Space group type (no.)                                      | <i>P</i> 2 <sub>1</sub> / <i>n</i> (14)                                                                                                  | <i>P</i> 2 <sub>1</sub> / <i>n</i> (14)                                                                                                                                   | <i>R</i> 3 <i>c</i> (161)                                                                      |
| Z, Z'                                                       | 4, 1                                                                                                                                     | 4, 1                                                                                                                                                                      | 18, 1                                                                                          |
| <i>a</i> (Å)                                                | 21.7869(7)                                                                                                                               | 14.8031(4)                                                                                                                                                                | 34.921(2)                                                                                      |
| <i>b</i> (Å)                                                | 13.4146(3)                                                                                                                               | 26.6122(8)                                                                                                                                                                | 34.921(2)                                                                                      |
| <i>c</i> (Å)                                                | 24.8701(8)                                                                                                                               | 17.8342(4)                                                                                                                                                                | 11.6219(8)                                                                                     |
| $\alpha$ (°)                                                | 90°                                                                                                                                      | 90°                                                                                                                                                                       | 90°                                                                                            |
| $\beta$ (°)                                                 | 113.690(4)°                                                                                                                              | 95.991(2)°                                                                                                                                                                | 90°                                                                                            |
| $\gamma$ (°)                                                | 90°                                                                                                                                      | 90°                                                                                                                                                                       | 120°                                                                                           |
| Volume (Å <sup>3</sup> )                                    | 6656.1(4)                                                                                                                                | 6987.3(3)                                                                                                                                                                 | 12274.1(15)                                                                                    |
| Refl. collected                                             | 260578                                                                                                                                   | 84638                                                                                                                                                                     | 23803                                                                                          |
| unique                                                      | 20196                                                                                                                                    | 18834                                                                                                                                                                     | 4133                                                                                           |
| observed [ <i>I</i> > 2 $\sigma$ ( <i>I</i> )]              | 16699                                                                                                                                    | 15872                                                                                                                                                                     | 3799                                                                                           |
| Data collection ranges                                      | 2.54° < $\theta$ < 30.49°<br>-31 ≤ <i>h</i> ≤ 30<br>-19 ≤ <i>k</i> ≤ 17<br>-35 ≤ <i>l</i> ≤ 35                                           | 1.89° < $\theta$ < 31.28°<br>-19 ≤ <i>h</i> ≤ 19<br>-36 ≤ <i>k</i> ≤ 36<br>-25 ≤ <i>l</i> ≤ 25                                                                            | 2.53° < $\theta$ < 66.60°<br>-41 ≤ <i>h</i> ≤ 41<br>-40 ≤ <i>k</i> ≤ 41<br>-13 ≤ <i>l</i> ≤ 10 |
| Completeness (to $\theta$ )                                 | 99.5% (30.5°)                                                                                                                            | 99.7% (27.0°)                                                                                                                                                             | 100.0% (66.6°)                                                                                 |
| Data / restr. / param.                                      | 20196 / 0 / 877                                                                                                                          | 18834 / 0 / 900                                                                                                                                                           | 4133 / 1 / 267                                                                                 |
| <i>R</i> <sub>int</sub>                                     | 0.0893                                                                                                                                   | 0.0385                                                                                                                                                                    | 0.1133                                                                                         |
| <i>R</i> <sub>1</sub> [ <i>I</i> > 2 $\sigma$ ( <i>I</i> )] | 0.0580                                                                                                                                   | 0.0383                                                                                                                                                                    | 0.0654                                                                                         |
| <i>wR</i> <sub>2</sub> (all data)                           | 0.1323                                                                                                                                   | 0.0916                                                                                                                                                                    | 0.1767                                                                                         |
| GoF on <i>F</i> <sup>2</sup>                                | 1.129                                                                                                                                    | 1.014                                                                                                                                                                     | 1.053                                                                                          |
| Largest peak/hole (Å <sup>-3</sup> )                        | 1.103 / -1.599                                                                                                                           | 1.090 / -0.892                                                                                                                                                            | 2.059 / -0.757                                                                                 |
| Abs. struct. par. (Friedel cov.)                            | n/a                                                                                                                                      | n/a                                                                                                                                                                       | -0.02(2)                                                                                       |
| CCDC no.                                                    | 2129865                                                                                                                                  | 2129864                                                                                                                                                                   | 2129859                                                                                        |

**Table S1 cont'd.** Crystallographic data collection parameters for  
 $[\text{Rh}(\text{PPh}_3)_2(\text{Bcat})(\text{Bpin})(\text{Cl})] \cdot (\text{dcm})_{3.5}(\text{C}_5\text{H}_{12})_{0.5}$ , **5c** and **6c**(THF) $_{0.53}(\text{C}_5\text{H}_{12})_{0.47}$ .

|                                      | $[\text{Rh}(\text{PPh}_3)_2(\text{Bcat})(\text{Bpin})(\text{Cl})] \cdot (\text{dcm})_{3.5}(\text{C}_5\text{H}_{12})_{0.6}^a$                 | <b>5c</b>                                                                                                        | <b>6c</b> (THF) $_{0.53}(\text{C}_5\text{H}_{12})_{0.47}$                                                        |
|--------------------------------------|----------------------------------------------------------------------------------------------------------------------------------------------|------------------------------------------------------------------------------------------------------------------|------------------------------------------------------------------------------------------------------------------|
| Chemical Formula                     | $[\text{C}_{48}\text{H}_{45}\text{B}_2\text{ClO}_4\text{P}_2\text{Rh}] (\text{CH}_2\text{Cl}_2)_{3.5} \cdot (\text{C}_5\text{H}_{12})_{0.6}$ | $[\text{C}_{23}\text{H}_{46}\text{B}_2\text{NO}_4\text{P}_3\text{Rh}] [\text{C}_{32}\text{H}_{12}\text{BF}_2_4]$ | $[\text{C}_{23}\text{H}_{46}\text{B}_2\text{NO}_4\text{P}_3\text{Rh}] [\text{C}_{32}\text{H}_{12}\text{BF}_2_4]$ |
| Formula mass (g mol <sup>-1</sup> )  | 1248.41                                                                                                                                      | 1481.27                                                                                                          | 1553.39                                                                                                          |
| Crystal shape                        | block                                                                                                                                        | cuboid                                                                                                           | block                                                                                                            |
| Crystal color                        | clear orange                                                                                                                                 | clear colourless                                                                                                 | clear colourless                                                                                                 |
| Crystal size (mm <sup>3</sup> )      | 0.697 × 0.455 × 0.411                                                                                                                        | 0.214 × 0.109 × 0.088                                                                                            | 0.210 × 0.167 × 0.090                                                                                            |
| Temp., Radiation                     | 102 K, MoK $\alpha$                                                                                                                          | 100 K, MoK $\alpha$                                                                                              | 100 K, MoK $\alpha$                                                                                              |
| Abs. coefficient (corr.)             | 0.767 mm <sup>-1</sup> (multi-scan)                                                                                                          | 0.452 mm <sup>-1</sup> (multi-scan)                                                                              | 0.444 mm <sup>-1</sup> (multi-scan)                                                                              |
| Crystal system                       | monoclinic                                                                                                                                   | monoclinic                                                                                                       | monoclinic                                                                                                       |
| Space group type (no.)               | $P2_1/n$ (14)                                                                                                                                | $P2_1/c$ (14)                                                                                                    | $P2_1/c$ (14)                                                                                                    |
| Z, Z'                                | 4, 1                                                                                                                                         | 4, 1                                                                                                             | 4, 1                                                                                                             |
| a (Å)                                | 11.2915(2)                                                                                                                                   | 18.0677(3)                                                                                                       | 20.9665(3)                                                                                                       |
| b (Å)                                | 21.8994(4)                                                                                                                                   | 13.9610(2)                                                                                                       | 13.5826(1)                                                                                                       |
| c (Å)                                | 23.4243(5)                                                                                                                                   | 25.9822(4)                                                                                                       | 26.9822(4)                                                                                                       |
| $\alpha$ (°)                         | 90°                                                                                                                                          | 90°                                                                                                              | 90°                                                                                                              |
| $\beta$ (°)                          | 95.632(2)°                                                                                                                                   | 99.739(2)°                                                                                                       | 112.321(2)°                                                                                                      |
| $\gamma$ (°)                         | 90°                                                                                                                                          | 90°                                                                                                              | 90°                                                                                                              |
| Volume (Å <sup>3</sup> )             | 5764.3(2)                                                                                                                                    | 6459.4(2)                                                                                                        | 6948.0(1)                                                                                                        |
| Refl. collected                      | 356179                                                                                                                                       | 281801                                                                                                           | 656079                                                                                                           |
| unique                               | 20671                                                                                                                                        | 24676                                                                                                            | 27493                                                                                                            |
| observed [ $I > 2\sigma(I)$ ]        | 17785                                                                                                                                        | 19168                                                                                                            | 22605                                                                                                            |
| Data collection ranges               | 2.29° < $\theta$ < 32.98°<br>-16 ≤ h ≤ 16<br>-32 ≤ k ≤ 33<br>-35 ≤ l ≤ 35                                                                    | 2.56° < $\theta$ < 34.23°<br>-26 ≤ h ≤ 28<br>-20 ≤ k ≤ 21<br>-40 ≤ l ≤ 39                                        | 1.60° < $\theta$ < 34.23°<br>-33 ≤ h ≤ 28<br>-20 ≤ k ≤ 21<br>-41 ≤ l ≤ 40                                        |
| Completeness (to $\theta$ )          | 99.9% (30.0°)                                                                                                                                | 99.9% (25.2°)                                                                                                    | 99.9% (25.2°)                                                                                                    |
| Data / restr. / param.               | 20671 / 327 / 751                                                                                                                            | 24676 / 0 / 834                                                                                                  | 0371 / 64 / 993                                                                                                  |
| $R_{int}$                            | 0.0443                                                                                                                                       | 0.0334                                                                                                           | 0.0556                                                                                                           |
| $R_1 [I > 2\sigma(I)]$               | 0.0375                                                                                                                                       | 0.0428                                                                                                           | 0.0371                                                                                                           |
| $wR_2$ (all data)                    | 0.0839                                                                                                                                       | 0.1128                                                                                                           | 0.0948                                                                                                           |
| GoF on $F^2$                         | 1.083                                                                                                                                        | 1.035                                                                                                            | 1.035                                                                                                            |
| Largest peak/hole (Å <sup>-3</sup> ) | 0.876 / -0.683                                                                                                                               | 1.729 / -1.093                                                                                                   | 0.950 / -0.387                                                                                                   |
| Abs. struct. par. (Friedel cov.)     | n/a                                                                                                                                          | n/a                                                                                                              | n/a                                                                                                              |
| CCDC no.                             | 2129862                                                                                                                                      | 2129867                                                                                                          | 2129870                                                                                                          |

a The crystal was handled below -40 °C throughout the mounting process using an X-temp 2 apparatus. The crystal was mounted on top of a glass fibre in perfluoroether oil and placed in a cold nitrogen gas stream on the diffractometer at -171 °C.<sup>S3</sup>

Three (disordered) CH<sub>2</sub>Cl<sub>2</sub> moieties were refined applying split atom models, applying geometrical restraints on C-Cl distances (DFIX); certain atom pairs were refined with a common ADP (EADP).

An initial refinement of residual electron density suggested the presence of disordered CH<sub>2</sub>Cl<sub>2</sub>/C<sub>5</sub>H<sub>12</sub> in an approximate 1:1.2 ratio. No appropriate model could be established for these disordered CH<sub>2</sub>Cl<sub>2</sub>/*n*-pentane molecules; the data were processed using the BYPASS algorithm as implemented in OLEX2.<sup>S4,5</sup>

2.b.  $[(\text{Me}_3\text{P})_4\text{RhH}(\text{Cl})][\text{B}(1,2\text{-O}_2\text{C}_6\text{H}_4)_2](\text{THF})$

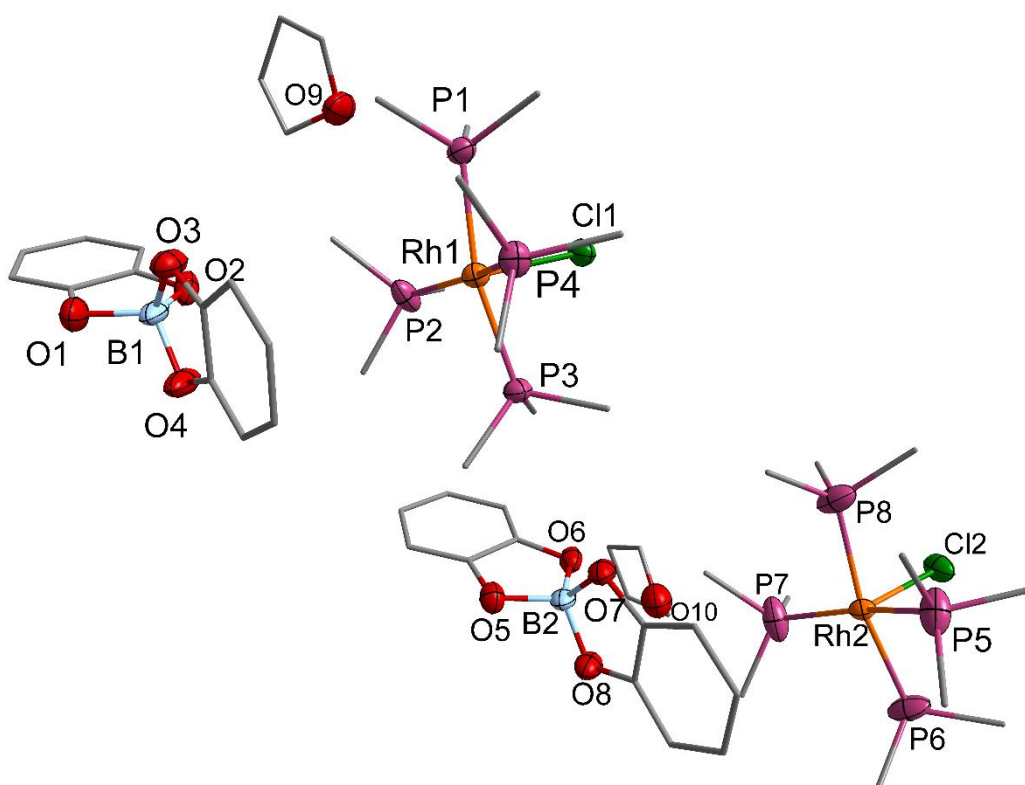

**Figure S2b.1** Asymmetric unit of  $[(\text{Me}_3\text{P})_4\text{RhH}(\text{Cl})][\text{B}(1,2\text{-O}_2\text{C}_6\text{H}_4)_2](\text{THF})$ . Selected distances (Å) and angles (°): Rh1–Cl1 2.487(2), Rh1–P1 2.342(2), Rh1–P2 2.328(2), Rh1–P3 2.334(2), Rh1–P4 2.328(2), P1–Rh1–P3 165.26(9), P2–Rh1–P4 158.01(9); Rh2–Cl2 2.490(2), Rh2–P5 2.312(3), Rh2–P6 2.346(3), Rh2–P7 2.342(3), Rh2–P8 2.314(3), P5–Rh2–P7 165.8(1), P6–Rh2–P8 158.8(1).

The solid-state structure of the cation  $[(\text{Me}_3\text{P})_4\text{RhH}(\text{Cl})]^+$  in  $[(\text{Me}_3\text{P})_4\text{RhH}(\text{Cl})][\text{B}(1,2\text{-O}_2\text{C}_6\text{H}_4)_2]$  resemble that of the ion in  $[(\text{Me}_3\text{P})_4\text{RhH}(\text{Cl})][\text{B}(1,2\text{-O}_2\text{C}_6\text{Br}_4)_2]$  (Rh1–Cl1 2.51(1) Å, Rh1–P1 2.357(2) Å, Rh1–P2 2.345(2) Å, Rh1–P3 2.343(2) Å, Rh1–P4 2.322(2) Å, P1–Rh1–P3 166.27(9)°, P2–Rh1–P4 159.16(9)°).<sup>S1</sup> The geometrical similarity suggests that the both structures contain the same cation  $[(\text{Me}_3\text{P})_4\text{RhH}(\text{Cl})]^+$  despite that the hydrido ligand was not identified in the X-ray structure determination of  $[(\text{Me}_3\text{P})_4\text{RhH}(\text{Cl})][\text{B}(1,2\text{-O}_2\text{C}_6\text{H}_4)_2](\text{THF})$ .

## 2.c. [(Me<sub>3</sub>P)<sub>2</sub>Rh(Bpin)<sub>2</sub>(Cl)] (3b) and 2b-3b

The oxidative addition of **1b** to [Rh(PMe<sub>3</sub>)<sub>3</sub>Cl] did not only furnished **2b** but also the five coordinate rhodium(III) complex [Rh(PMe<sub>3</sub>)<sub>2</sub>(Bpin)<sub>2</sub>Cl] (**3b**). Two different solid state structures of **3b** were obtained, one in the trigonal space group type *R3c* comprising one molecule in the asymmetric unit (*Z* = 18, *Z'* = 1) of only mediocre quality and one of better quality co-crystallised with **2b** as **2b-3b** (Figure S2c.1).

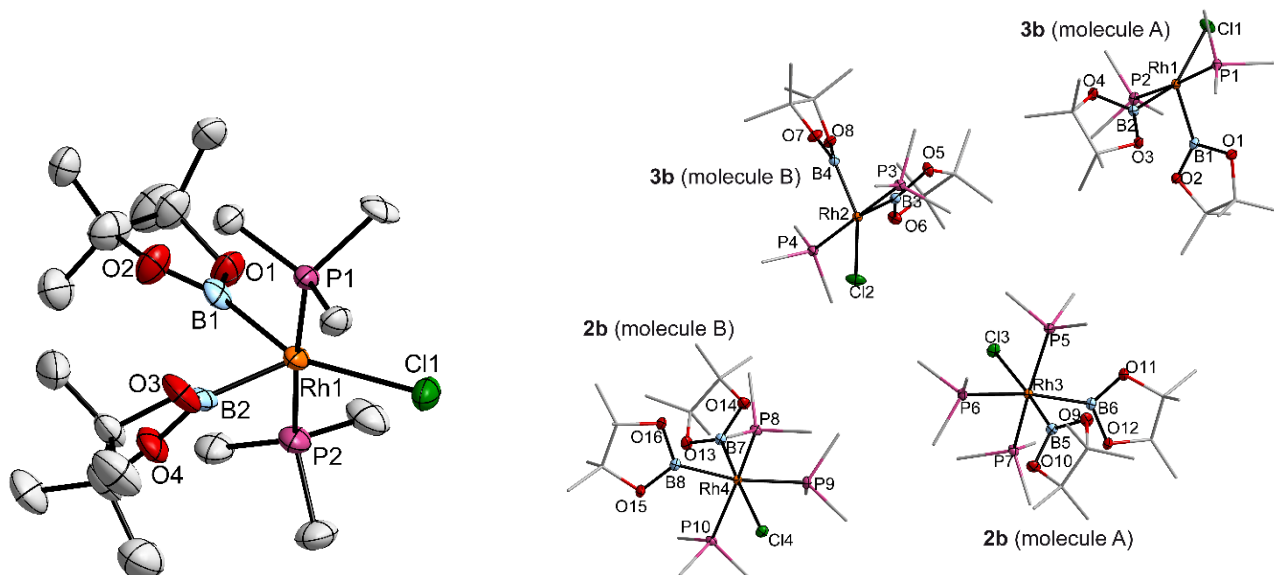

**Figure S2c.1 Left:** Molecular structures of **3b** from **3b** in *R3c*. Selected distances (Å) and angles (°): Rh1–Cl1 2.448(3), Rh1–P1 2.302(3), Rh1–P2 2.320(3), Rh1–B1 2.01(1), Rh1–B2 1.99(2), B1...B2 2.45(2), P1–Rh1–P2 176.1(1), B1–Rh1–Cl1 152.7(4), B2–Rh1–Cl1 131.4(4), B1–Rh1–B2 75.9(5),  $\tau_{B1}$  38(2),  $\tau_{B1}$  72(2).

**Right:** Asymmetric unit of the solid state structure of **2b-3b**. Selected geometrical data of **3b** [Å / °]: molecule A: Rh1–Cl1 2.4425(2), Rh1–P1 2.3075(2), Rh1–P2 2.3070(2), Rh1–B1 1.9767(9), Rh1–B2 2.0108(9), B1...B2 2.457(2), P1–Rh1–P2 176.025(9), B1–Rh1–Cl1 129.33(3), B2–Rh1–Cl1 154.58(3), B1–Rh1–B2 76.07(4),  $\tau_{B1}$  72.12(9),  $\tau_{B2}$  30.3(2); molecule B: Rh2–Cl2 2.4341(2), Rh2–P3 2.3030(2), Rh2–P4 2.3076(2), Rh2–B3 1.9884(9), Rh2–B4 1.9961(9), B3...B4 2.468(2), P3–Rh2–P4 176.344(9), B3–Rh2–Cl2 132.71(3), B4–Rh2–Cl2 150.74(3), B3–Rh2–B4 76.55(4),  $\tau_{B2}$  74.1(1),  $\tau_{B4}$  34.0(2).

The latter one, **2b-3b**, will exclusively be discussed, however, the geometrical data of **3b** do not differ significantly between both structures, as well as for the two independent molecules of **3b** within **2b-3b**. Whilst **3b** exhibits a different coordination geometry at the rhodium atom as **2b** and **4b**, a comparison with these complexes has to be done with due caution. The molecular geometry of **3b** may be deduced from the geometry of **2b** by removal of one PMe<sub>3</sub> ligand and subsequent reorganisation in the equatorial plane. Both the Rh–Cl and Rh–P distances decrease from **2b** to **3b**, the Rh–Cl distance by about 0.1 Å, as no directly *trans* standing ligand is now present and the *trans*-P–Rh distances, just significantly, by about 0.01-0.02 Å. More informative are the changes within the equatorial plane. The

approximately linear angle B2–Rh1–Cl1 in **2b** is reduced by approx. 25° to 150–155°, whilst the B1–Rh1–Cl1 angle of 106.02(2)° in **2b**(PhMe) increases by the same amount to 129–133° in **3b**. The B–Rh–B angle does, consequently, not change significantly. The B···B distance however is in **3b** even smaller (by 0.1 Å) than in **2b**, as the B–Rh distances in **3b** is also reduced by about 0.1 Å. The fact that the B···B distance decreases upon reducing the coordination number under reorganisation of, essentially, only the equatorial plane implies that steric reasons are not essential for the small B···B distances in the six coordinated complexes **2b** and **4b**.

A comparison of the geometry of **3b** with other five coordinate rhodium(II) *bis*-boryl complexes, [Rh(PEt<sub>3</sub>)<sub>2</sub>(Cl)(Bcat)<sub>2</sub>], [Rh(PPh<sub>3</sub>)<sub>2</sub>(Cl)(Bcat)<sub>2</sub>], reported by Marder and co-workers and the complex [Rh(PPh<sub>3</sub>)<sub>2</sub>(Cl)(Bcat)(Bpin)] (only crystallographically characterised, see sections 1.a and 2.d) showed that the geometries are over all comparable. The acute B–Rh–B angle below 80° and a short B···B distance in the 2.5 Å range are found as common characteristics.<sup>S6</sup>

In other words, for all *bis*-Bpin complexes short B···B distances (<2.6 Å) are observed, independently of the anionic (**2b**) or neutral auxiliary ligands (**4b**) or the coordination number (**3b**). Whereas for the *bis*-Bcat and BcatBpin complexes significantly longer B···B distances (>2.75 Å) are found in six coordinate complexes, whereas five-coordinate complexes show similarly short B···B distances.

2.d.  $[\text{Rh}(\text{PPh}_3)_2(\text{Bcat})(\text{Bpin})(\text{Cl})](\text{CH}_2\text{Cl}_2)_{3.5}(\text{C}_5\text{H}_{12})_{0.6}$

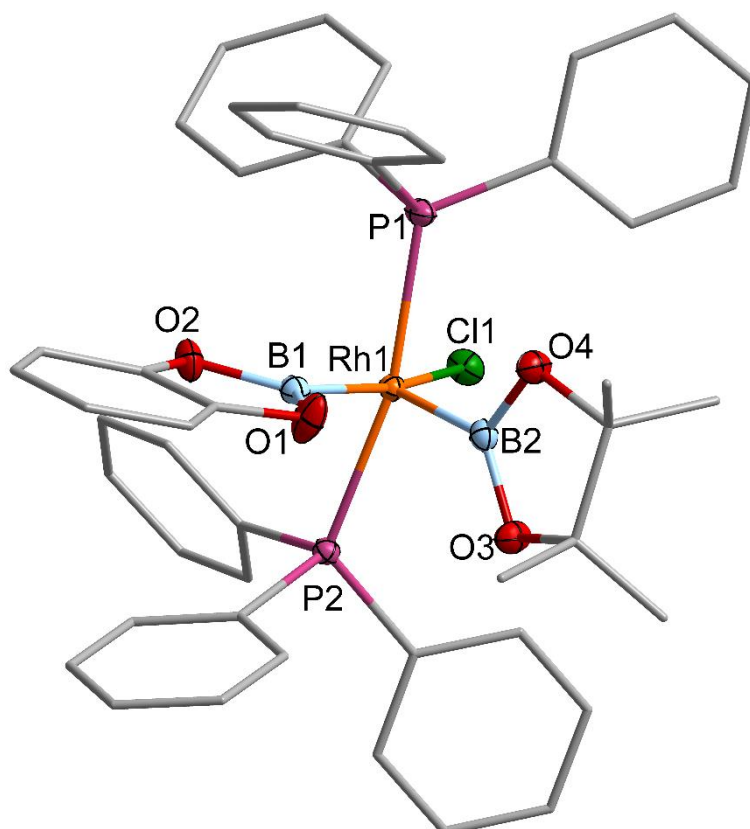

**Figure S2d.1** Molecular structure of  $[\text{Rh}(\text{PPh}_3)_2(\text{Bcat})(\text{Bpin})(\text{Cl})]$ . Selected distances (Å) and angles (°): Rh1–Cl1 2.4464(4), Rh1–P1 2.3190(4), Rh1–P2 2.3248(4), Rh1–B1 1.997(2), Rh1–B2 1.996(2), B1...B2 2.491(3), P1–Rh1–P2 167.30(2), B1–Rh1–Cl1 163.21(6), B2–Rh1–Cl1 119.59(5), B1–Rh1–B2 77.19(8),  $\tau_{\text{B1}}$  0.7(2),  $\tau_{\text{B1}}$  82.7(1).

## 2.e. $[\text{Rh}(\text{PMe}_3)_3(\text{Bcat})(\text{Bpin})(\text{L})][\text{BARf}]$ ( $\text{L} = \text{MeCN}$ (**5c**), $\text{MeNC}$ (**6c**))

To elucidate the influence of different ligands *trans* to a boryl ligand we synthesised the complexes **5c** and **6c** (*vide supra*). The complexes crystallise in a monoclinic space group  $P2_1/c$  as **5c** and as the solvate  $\text{6c}(\text{THF})_{0.53}(\text{C}_5\text{H}_{12})_{0.47}$  with one formula unit in the asymmetric unit.

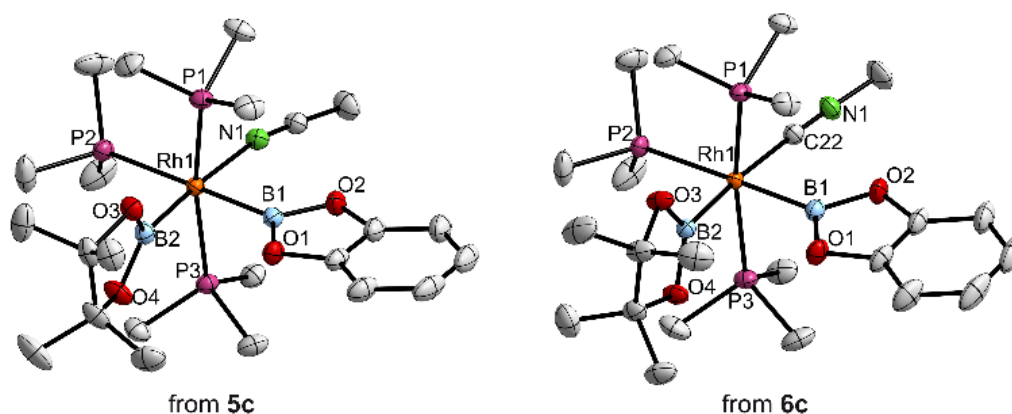

**Figure S2e.1** Molecular structures of the cations in **5c** and **6c** from X-ray diffraction studies on **5c** and  $\text{6c}(\text{THF})_{0.53}(\text{C}_5\text{H}_{12})_{0.47}$ . Selected geometrical data [ $\text{\AA}$  /  $^\circ$ ]:

**5c**: Rh1–N1 2.209(2), Rh1–P1 2.3351(4), Rh1–P2 2.4115(4), Rh1–P3 2.3396(4), Rh1–B1 2.054(2), Rh1–B2 2.027(2), B1...B2 2.734(3), P1–Rh1–P2 166.57(2), B1–Rh1–P2 179.22(6), B2–Rh1–N1 175.49(7), B1–Rh1–B2 84.14(8),  $\tau_{\text{B1}}$  0.68(8),  $\tau_{\text{B2}}$  80.1(1).

**6c**: Rh1–C22 2.063(1), Rh1–P1 2.3369(4), Rh1–P2 2.3969(3), Rh1–P3 2.3367(3), Rh1–B1 2.056(1), Rh1–B2 2.080(1), B1...B2 2.755(2), P1–Rh1–P2 166.85(1), B1–Rh1–P2 177.74(5), B2–Rh1–C22 173.49(5), B1–Rh1–B2 83.51(6),  $\tau_{\text{B1}}$  5.99(6),  $\tau_{\text{B2}}$  82.22(6).

The structure of both complexes may be deduced from the structure of the chlorido complex **2c** by replacing the chlorido ligand with the neutral ligands acetonitrile or methylisonitrile, respectively (Figure 6).<sup>8</sup> Structurally both complexes fit in the series **2c**, **5c**, **6c**, **4c**. While the general structure does not change significantly, the Rh1–B2 distances show the effect of the different *trans* ligand strengths being by about 0.05  $\text{\AA}$  shorter for the weak MeCN (**5c**) than for the stronger MeNC (**6c**) ligand. This increase is comparable to the change of 0.07  $\text{\AA}$  observed going from a chlorido ligand in **2c** to a phosphine ligand in **4c**.

### 3. References

- S1 N. C. Norman, A. G. Orpen, M. J. Quayle and E. G. Robins, *Acta Cryst.*, 2000, **C56**, 50–52.
- S2 D. Kratzert, J.J. Holstein and I. Krossing, *J. Appl. Cryst.*, 2015, **48**, 933–938.
- S3 D. Stalke, *Chem. Soc. Rev.*, 1998, **27**, 171–178.
- S4 O. V. Dolomanov, L. J. Bourhis, R. J. Gildea, J. A. K. Howard and, H. Puschmann, *J. Appl. Crystallogr.*, 2009, **42**, 339–34.
- S5 A. L. Spek, *Acta Cryst.*, 1990, **A46**, 194-201.
- S6 W. Clegg, F. J. Lawlor, T. B. Marder, P. Nguyen, N. C. Norman, A. G. Orpen, M. J. Quayle, C. R. Rice, E. G. Robins, A. J. Scott, F. E. S. Souza, G. Stringer and G. R. Whittell, *J. Chem. Soc., Dalton Trans.* **1998**, 301–310.
